# 1 Multiple spatial behaviours govern 2 social network positions in a wild 3 ungulate

4 Gregory F Albery<sup>1,2\*</sup>, Alison Morris<sup>2</sup>, Sean Morris<sup>2</sup>, Josephine M  
5 Pemberton<sup>2</sup>, Tim H. Clutton-Brock<sup>2,3</sup>, Daniel H Nussey<sup>2</sup>, Josh A Firth<sup>4,5</sup>

6 1. Department of Biology, Georgetown University, Washington, DC  
7 2. Institute of Evolutionary Biology, University of Edinburgh, Edinburgh, UK  
8 3. Department of Zoology, University of Cambridge, Cambridge, UK  
9 4. Department of Zoology, University of Oxford, Oxford, UK  
10 5. Merton College, University of Oxford, Oxford, UK

11 \*gfalbery@gmail.com

## 12 Abstract

13 The structure of wild animal social systems depends on a complex combination of intrinsic  
14 and extrinsic drivers. Population structuring and spatial behaviour are key determinants of  
15 individuals' observed social behaviour, but quantifying these spatial components alongside  
16 multiple other drivers remains difficult due to data scarcity and analytical complexity. We  
17 used a 43-year dataset detailing a wild red deer population to investigate how individuals'  
18 spatial behaviours drive social network positioning, while simultaneously assessing other  
19 potential contributing factors. Using Integrated Nested Laplace Approximation (INLA) multi-  
20 matrix animal models, we demonstrate that social network positions are shaped by two-  
21 dimensional landscape locations, pairwise space sharing, individual range size, and spatial  
22 and temporal variation in population density, alongside smaller but detectable impacts of a  
23 selection of individual-level phenotypic traits. These results indicate strong, multifaceted  
24 spatiotemporal structuring in this society, emphasising the importance of considering  
25 multiple spatial components when investigating the causes and consequences of sociality.

26 Word Count: **Abstract:** 143 words; **Main text:** 4720 words  
27 Number of figures: 4; Number of tables: 0; Number of references: 53

## 28 Authorship Statement

29 GFA conceived the study, analysed the data, and wrote the manuscript, advised by JAF. AM  
30 and SM collected the data. JAF, JMP, THCB, and DN commented on the manuscript.

## 31 Data Accessibility Statement

32 The code used here is available at [https://github.com/gfalbery/Social\\_Deer](https://github.com/gfalbery/Social_Deer). On  
33 acceptance, the data will be uploaded to the same repo, which will be archived on Zenodo.

## 34 Introduction

35 Social behaviour is an integral component of an animal's phenotype, driving processes  
36 including disease transmission, mating, learning, and selection (Croft *et al.* 2008;  
37 VanderWaal *et al.* 2014; Krause *et al.* 2015; Firth *et al.* 2018; Sah *et al.* 2018; Silk *et al.*  
38 2019; Firth 2020). Contemporary studies of animal behaviour often use social networks to  
39 derive individual-level social network positions, under the notion that between-individual  
40 variation in network positioning is indicative of between-individual variation in social  
41 behaviour (Franks *et al.* 2010; Krause *et al.* 2015; Sosa *et al.* 2020). However, an animal's  
42 position in its social network is also dependent on its own spatial behaviour (Webber &  
43 Vander Wal 2018; Albery *et al.* 2020a), and on a range of extrinsic factors: demography  
44 determines local population density and structuring (Shizuka & Johnson 2019), while the  
45 environment shapes resource distributions, movement corridors, and emergent patterns of  
46 space use, all of which will influence the architecture of the social system (Firth & Sheldon  
47 2016; Webber & Vander Wal 2018; Farine & Sheldon 2019; He *et al.* 2019). As such, it is  
48 important to consider spatial behaviour and environmental context when assessing the  
49 causes and consequences of individual-level social network positioning (Webber & Vander  
50 Wal 2018; He *et al.* 2019; Albery *et al.* 2020a), yet doing so remains difficult in most systems  
51 due to the complexity of spatial-social analyses that incorporate these processes.

52 The spatial drivers of social network structure are poorly understood because they are highly  
53 multivariate and (therefore) difficult to analyse. On the one hand, there is strong support for  
54 simpler "first-order" associations between spatial and social behaviour. For example, spatial  
55 proximity and social connections are often correlated, because individuals that share more  
56 space are more likely to associate or interact. This finding holds for diverse taxa including elk  
57 (Vander Wal *et al.* 2014), raccoons (Robert *et al.* 2012), birds (Firth & Sheldon 2016), and  
58 myriad other systems. Similarly, spatial and social network centrality are occasionally found  
59 to correlate (Mourier *et al.* 2019), as are temporal variation in population density and social  
60 contact rates (Sanchez & Hudgens 2015), and the social environment can drive spatial  
61 behaviour (Firth & Sheldon 2016; Spiegel *et al.* 2016). Spatial behaviours can be  
62 summarised using a wide range of metrics, including individuals' spatial activity levels (e.g.  
63 home range area), pairwise space sharing (e.g. distances or home range overlaps),  
64 demographic structure (e.g. temporal population size or local conspecific density), and point  
65 location on the two-dimensional landscape. For example, are more social individuals simply  
66 wider-ranging, leading them to make more contacts? Do they most often inhabit areas of  
67 high population density or well-used movement corridors? These variable spatial  
68 components take a combination of different data structures, and are therefore difficult to  
69 include in the same models, particularly in large numbers and alongside a range of other

70 individual-level phenotypes. It is therefore unclear to what extent individuals' social network  
71 positions emerge from 1) their own social behaviour; 2) their own spatial behaviour; 3) their  
72 situation within the population and broader social network; 4) other aspects of their biotic and  
73 abiotic environment such as landscape structure; and 5) intrinsic phenotypic traits that  
74 researchers are commonly interested in investigating.

75 Several frameworks have been proposed to facilitate the untangling of spatial and social  
76 processes in wild animals (Jacoby & Freeman 2016; Silk *et al.* 2018, 2019; Webber &  
77 Vander Wal 2018; Mourier *et al.* 2019; Albery *et al.* 2020a). To date, statistical methodology  
78 focusses on incorporating spatial behaviours into the node-and-edge structure of network  
79 data, using e.g. null network permutations (Firth & Sheldon 2016), spatially embedded  
80 networks (Daraganova *et al.* 2012), and nested "networks of networks" composed of  
81 movement trajectories (Mourier *et al.* 2019). Many such analyses involve reducing  
82 movement patterns into some form of spatial network based on home range overlap or  
83 spatial proximity between dyads (Mourier *et al.* 2019). For example, statistical models  
84 named "animal models" can examine spatial variation by fitting such matrices as variance  
85 components, potentially alongside other dyadic similarity matrices (i.e., pairwise measures of  
86 similarity), to quantify genetic and non-genetic contributions to individuals' phenotypes  
87 (Kruuk 2004; Stopher *et al.* 2012b; Regan *et al.* 2016; Thomson *et al.* 2018; Webber &  
88 Vander Wal 2018). As yet, the focus on controlling for spatial autocorrelation using space  
89 sharing and network permutations has contributed to a lack of clarity concerning the role that  
90 spatial behaviour and environmental context play in driving social network positioning  
91 (Albery *et al.* 2020a).

92 Studies across ecological disciplines increasingly use Integrated Nested Laplace  
93 Approximation (INLA) models to control for spatial autocorrelation in a multitude of contexts  
94 (Lindgren *et al.* 2011; Lindgren & Rue 2015; Zuur *et al.* 2017). As well as including fixed and  
95 random effects to quantify individual-level drivers, these models can incorporate dyadic  
96 space sharing components (Holand *et al.* 2013) and stochastic partial differentiation  
97 equation (SPDE) effects to model 2-dimensional spatial patterns in the response variable,  
98 thereby controlling for and estimating spatiotemporal variation associated with fine-scale  
99 positioning within the landscape (Albery *et al.* 2019). As such, these models offer an exciting  
100 opportunity to test and compare the roles of a range of spatial behaviours and  
101 autocorrelation structures, alongside phenotypic drivers, in determining social network  
102 positioning.

103 We address this question using the long-term study in the Isle of Rum red deer (*Cervus*  
104 *elaphus*). These study animals comprise an unmanaged wild population with a contiguous

105 fission-fusion social system (Clutton-Brock *et al.* 1982). They experience strong  
106 environmental gradients and exhibit spatial autocorrelation in a number of important  
107 phenotypes: individuals with greater home range overlap have more similar behavioural and  
108 life history traits (Stopher *et al.* 2012b), and those in closer proximity have more similar  
109 parasite burdens (Albery *et al.* 2019); further, as with other matrilineal mammalian systems,  
110 closely related individuals frequently associate (Clutton-Brock *et al.* 1982) and live closer  
111 together (Stopher *et al.* 2012b). Individuals have highly repeatable home ranges (Stopher *et al.*  
112 *et al.* 2012b) that decline in size over their lifetimes, predicting declining survival probability  
113 (Froy *et al.* 2018). The study area has a strong spatial gradient in resource availability, with  
114 high-quality grazing heavily concentrated in the far north of the system, and with most  
115 individuals aggregating around this area, such that population density decreases outwards  
116 towards the edge of the study population (Clutton-Brock *et al.* 1982). As such, the deer  
117 comprise an ideal system for assessing spatial-social relationships in the wild.

118 To assess how individuals' spatial behaviours translate to social network positions, we  
119 constructed fine-scale social networks from 43 years of censuses of the study population.  
120 We derived 8 different individual-level network positioning measures of varying complexity  
121 that are important to different social processes (Krause *et al.* 2015; Sosa *et al.* 2020). Using  
122 multi-matrix animal models in INLA, we examined whether spatial locations, space sharing,  
123 home range area, and local population density explained variation in network position  
124 metrics, alongside a range of individual-, temporal-, and population-level factors. Specifically,  
125 we aimed to test two hypotheses: that the structure of the social network would be highly  
126 dependent on the distribution of population density in space; and that individuals' social  
127 network centrality would be largely explained by their ranging behaviour, where wide-ranging  
128 individuals were more likely to be socially well-connected. We further expected that space  
129 sharing and point locations would uncover substantial spatial autocorrelation in social  
130 network positioning, and that different social network metrics would exhibit different spatial  
131 patterns and vary drivers. This not only comprises a large-scale empirical examination of the  
132 factors shaping social network positions in this extensively monitored wild mammal, but also  
133 provides a methodological advancement in developing powerful, flexible new methods  
134 (INLA-based multi-matrix animal models) with broad potential for examining spatial-social  
135 processes in this and other systems.

## 136 **Methods**

### 137 **Study system and censusing**

138 The study was carried out on an unpredated long-term study population of red deer on the  
139 Isle of Rum, Scotland (57°N,6°20'W). The natural history of this matrilineal mammalian

140 system has been studied extensively (Clutton-Brock *et al.* 1982), and we focussed on  
141 females aged 3+ years, as these individuals have the most complete associated census  
142 data, and few males live in the study area except during the mating period. Individuals are  
143 monitored from birth, providing substantial life history and behavioural data, and >90% of  
144 calves are caught and tagged, with tissue samples taken (Clutton-Brock *et al.* 1982). The  
145 population thus has comprehensive genomic data, allowing high-powered quantitative  
146 genetic analyses: most individuals born since 1982 have been genotyped at >37,000 SNPs,  
147 distributed throughout the genome (e.g. Huisman, Kruuk, Ellis, Clutton-Brock, & Pemberton,  
148 2016). Census data were collected for the years 1974-2017, totalling 423,070 census  
149 observations. Deer were censused by field workers five times a month, for eight months of  
150 the year, along one of two alternating routes (Clutton-Brock *et al.* 1982). Individuals'  
151 identities, locations (to the nearest 100M), and group membership were recorded. Grouping  
152 events were estimated by seasoned field workers according to a variant of the "chain rule"  
153 (e.g. Castles *et al.*, 2014), where individuals grazing in a contiguous group within close  
154 proximity of each other (under ~10 metres) were deemed to be associating, with mean 130.4  
155 groups observed per individual across their lifetime (range 6-943). The mortality period falls  
156 between Jan-March, when there is least available food, and minimal mortality occurs outside  
157 this period. We only used census records in each May-December period, from which we  
158 derived annual social network position measures as response variables (Figure 1-2). We  
159 elected to investigate this seasonal period because it stretches from the spring calving  
160 period until the beginning of the mortality period, simplifying network construction and  
161 avoiding complications arising from mortality events. Our dataset totalled 3356 annual  
162 observations among 532 grown females (Figure 1).

163 In this system, female reproduction imposes substantial costs for immunity and parasitism  
164 (Albery *et al.* 2020c), and for subsequent survival and reproduction (Clutton-Brock, Albon, &  
165 Guinness, 1989; Froy, Walling, Pemberton, Clutton-Brock, & Kruuk, 2016). If a female  
166 reproduces, she produces 1 calf per year in the spring, generally beginning in May; the "deer  
167 year" begins on May 1 for this reason. Here, reproductive status was classified into the  
168 following four categories using behavioural observations: True Yeld (did not give birth);  
169 Summer Yeld (the female's calf died in the summer, before 1<sup>st</sup> October); Winter Yeld (the  
170 female's calf died in the winter, after 1<sup>st</sup> October); and Milk (calf survived to 1<sup>st</sup> May the  
171 following calendar year).

## 172 [Generating spatial and social matrices](#)

173 All code is available online at [https://github.com/gfalbery/Spocial\\_Deer](https://github.com/gfalbery/Spocial_Deer). We constructed the  
174 home range overlap (HRO) matrix using the R package AdeHabitatHR (Calenge 2011),  
175 following previous methodology (Stopher *et al.* 2012b; Regan *et al.* 2016; Froy *et al.* 2018).

176 First, using a kernel density estimation method, we derived lifetime home ranges for each  
177 individual with more than five census observations. Previous analysis has shown that this  
178 system is robust to the number of observations used to generate home ranges (Froy *et al.*  
179 2018). We used lifetime home ranges to fit one value per individual in the animal models;  
180 individual ranges (and range sizes) correlate strongly from year to year (Stopher *et al.*  
181 2012b; Froy *et al.* 2018). We derived proportional HRO of each dyad using Bhattacharya  
182 Affinity (following Stopher *et al.* 2012b), producing values between 0-1 (i.e. no overlap to  
183 complete overlap).

184 To control for individuals' two-dimensional point locations, we used a Stochastic Partial  
185 Differentiation Equation (SPDE) effect in INLA. This effect models the distance between  
186 points to calculate spatial autocorrelation, using Matern covariance (Lindgren *et al.* 2011).  
187 This random effect used individuals' annual centroids (mean easting and northing in a given  
188 year) or lifetime centroids (mean easting and northing across all observations) as point  
189 locations to approximate spatial variation in the response variable (Lindgren *et al.* 2011;  
190 Albery *et al.* 2019).

191 We used a genomic relatedness matrix (GRM) using homozygosity at 37,000 Single  
192 Nucleotide Polymorphisms, scaled at the population level (Yang *et al.* 2011; for a population-  
193 specific summary, see Huisman *et al.* 2016). This matrix is well-correlated with pedigree-  
194 derived relatedness metrics (Huisman *et al.* 2016). HRO was well-correlated with distance  
195 between lifetime centroids (i.e., closer individuals tended to share more range), and both  
196 were weakly but significantly correlated with genetic relatedness (Supplementary Figure 1).

197 To test whether social network positions could be explained by population density, we  
198 derived the local density of individuals again using AdeHabitatHR (Calenge 2011). We  
199 generated density kernels of observations, and then assigned individual deer their local  
200 population density based on their location on this kernel, following previous methodology  
201 developed in badgers (Albery *et al.* 2020b). This local density value was then fitted as a fixed  
202 explanatory variable. We used four different density metrics, each examining the density of a  
203 different observation type: lifetime centroids ("lifetime density"); annual centroids ("annual  
204 density"); all observations across the study period ("sighting density"); and all observations in  
205 the focal year ("annual sighting density"). Only one such density metric was fitted at once.  
206 We also calculated annual home range areas (HRA) by taking the 70% isopleth of each  
207 individual's annual space use distribution, following previous methodology (Froy *et al.* 2018).  
208 This HRA variable was fitted as a fixed effect in the same way as local density.

209 We constructed a series of 43 annual social networks using "gambit of the group," where  
210 individuals in the same grouping event (as described above) were taken to be associating

211 (Franks *et al.* 2010). Dyadic associations were calculated using the ‘simple ratio index’  
212 (Cairns & Schwager 1987) derived as a proportion of total sightings (grouping events) in  
213 which the focal individuals were seen together:  $Sightings_{A,B}/(Sightings_A+Sightings_B-$   
214  $Sightings_{A,B})$ , or  $Intersect_{A,B}/Union_{A,B}$ . In this dyadic matrix, 0=never seen together and  
215 1=never seen apart.

## 216 Statistical Analysis

217 **Metrics.** Using the annual social networks, we derived eight individual-level network metrics  
218 which are commonly used across animal social networks and have been considered in  
219 detail(Whitehead 2008; Brent 2015; Krause *et al.* 2015; Firth *et al.* 2017). We set each of  
220 these network metrics for use as response variables in separate INLA Generalised Linear  
221 Mixed Models (GLMMs) with a Gaussian family specification. In increasing order of  
222 complexity, our measures included four direct sociality metrics, which only take into account  
223 an individual’s connections with other individuals: 1) Group Size – the average number of  
224 individuals a deer associated with per sighting; 2) Degree – the number of unique individuals  
225 she was observed with; 3) Strength – sum of all their weighted social associations to others;  
226 4) Mean Strength – the average association strength to each of the unique individuals she  
227 was observed with (equivalent to strength divided by degree). We also included four more  
228 complex “indirect” metrics (all using algorithms as specified from (Csardi & Nepusz 2006)),  
229 which also take into account an individual’s connections’ connections: 5) Eigenvector  
230 centrality – which considers the sum of their own connections and the sum of their  
231 associates’ connections; 6) Weighted Eigenvector – which is akin to eigenvector centrality  
232 but also accounts for the weights of theirs, and their associates, connections; 7)  
233 Betweenness – the number of shortest paths that pass through the focal individual to  
234 traverse the whole network; 8) Clustering (local) – the tendency for an individual’s contacts  
235 to be connected to one another, forming triads. The raw, untransformed correlations were  
236 assessed for all metrics, and R lay between -0.5 and 0.879 across metrics (Supplementary  
237 Figure 2). When modelling them as response variables, to approximate normality, all social  
238 metrics were square root-transformed apart from eigenvector centralities (which were left  
239 untransformed), group size (which was cube root-transformed), and betweenness (which  
240 was  $\log(X+1)$ -transformed). Each social network metric was fitted as a response variable in  
241 a separate model set (as outlined conceptually in Figure 1).

242 **Base model structure.** We ensured that all models followed the same base structure.  
243 Random effects included individual identity and year (categorical random intercepts), as well  
244 as the genetic relatedness matrix. Fixed effects included Age (continuous, in years),  
245 Reproductive Status (four categories: True Yeld; Summer Yeld; Winter Yeld; and Milk), and  
246 Number of observations (continuous, log-transformed to approximate normality), as well as

247 year-level continuous factors including Year (continuous) and that year's study Population  
248 Size (log-transformed). All continuous response and explanatory variables were  
249 standardised to have a mean of zero and a standard deviation of 1. Fixed effect estimates  
250 were provided by the mean and 95% credibility intervals of the posterior estimate  
251 distribution.

252 **Adding spatial components.** To investigate the divergent value of different spatial  
253 behaviours, we iteratively added spatial effects to the base model, investigating which  
254 behaviours best fit the data. These spatial behaviours corresponded to four broad  
255 components in Figure 1: space sharing (HRO matrix); home range area (HRA); point  
256 locations (SPDE effect); and local population density (density fixed effect). For space  
257 sharing, we only used one metric: lifetime HRO (see above). For point locations, we selected  
258 between 1) lifetime centroids; 2) annual centroids; and 3) annual centroids with a  
259 spatiotemporally varying annual field. For density, we used the four metrics outlined above  
260 ("lifetime", "annual", "sighting", and "annual sighting" density). To distinguish between  
261 competitive models we used Deviance Information Criterion (DIC). In each round, we added  
262 each spatial behaviour individually and then kept the best-fitting one, until all four had been  
263 added or their addition did not improve the model, using a cutoff of 2 DIC.

264 **Comparing all spatial and non-spatial drivers.** To compare the relative importance of all  
265 fixed and random effects, we examined the model's predicted values and their correlations  
266 with the observed values, representing the proportion of the variance that was explained by  
267 the model (i.e.,  $R^2$ ). We used the model to predict each social behaviour metric, and  
268 iteratively held each explanatory variable's predictions at the mean, one at a time. We then  
269 assessed the squared correlations of these values with the observed values, relative to  
270 those of the full model. Variables with greater effects in the model produced less accurate  
271 predicted values when held constant.

## 272 Results

273 Spatial behaviours were important in determining all eight individual-level social network  
274 position variables. The non-spatial model was far the poorest-fitting for all eight metrics, and  
275 the DIC changes associated with adding spatial components were substantial (Figure 3A).  
276 Generally, wide-ranging individuals and those living in areas of greater population density  
277 tended to be more central, and space sharing and point location effects both revealed  
278 substantial spatial autocorrelation (Figure 3).

279 As expected, home range area and population density had substantial effects on social  
280 network centrality (Figure 3). Population density was positively associated with all centrality



281 measures except betweenness and clustering (Figure 3A), and the best-fitting density metric  
282 was annual density. Individuals with larger home ranges likewise tended to be more social,  
283 except in the case of clustering (no effect) and mean strength, which were negatively  
284 associated with HRA (Figure 3A).

285 Notably, point location-based SPDE effects tended to improve model fit over these fixed  
286 effects, and had a greater effect than on model fit space sharing HRO effects, even when  
287 conceptualised at the same timescale (i.e., across the individual's lifetime). Investigating the  
288  $R^2$  components of the models containing only HRO (i.e., without SPDE effects) revealed that  
289 in general spatial overlap accounted for more variation than the genetic matrix  
290 (Supplementary Figure 3), but comparing these with the other models revealed that the point  
291 location effects contributed more than either of these matrices (Figure 3B). Annually varying  
292 centroids further improved model fit, and allowing the spatial field to vary between years in  
293 our spatiotemporal models improved models even more (Figure 3A). Although the space  
294 sharing and genomic relatedness matrices had similar sized impacts on the full models  
295 (Figure 3B), removing the SPDE effect resulted in a substantial increase in the HRO effect,  
296 but with very little impact on the GRM's  $R^2$  (Supplementary Figure 3). These findings were  
297 relatively consistent across all metrics (Figure 3A-B), although the SPDE effect was notably  
298 smaller for betweenness (Figure 3B). Taken together, these results reveal that lifetime space  
299 sharing was good at accounting for variation in social behaviour, but that its effect was  
300 surpassed by increasingly complex temporal formulations of point location effects.

301 We compared the importance of all fixed and random effects by predicting selectively from  
302 the model, revealing overwhelmingly strong effects of spatiotemporal drivers (Figure 3B).  
303 Our models fit well and explained a substantial amount of variation in social network  
304 centrality (>70%); the majority of the fit was lent by a combination of the INLA SPDE effect,  
305 fixed effects of local population density, and random effects of year (Figure 3B). Space  
306 sharing (HRO) and home range area (HRA) had comparatively small effects.

307 Observations also had a notable impact for Degree, Betweenness, and Clustering (Figure  
308 3B). Fixed effects for year and observation numbers were generally strong and significantly  
309 positive across metrics, except in the case of clustering, for which observation number's  
310 effect was significantly negative (Figure 3B). There were also small positive effects of  
311 population size on betweenness and degree centrality (Figure 3B).

312 Although individual-level drivers (reproduction, age, and individual identity) had a negligible  
313 impact on all variables'  $R^2$  (Figure 3B), many had a significant effect (i.e., their 95%  
314 credibility intervals did not overlap with zero; Figure 3C). Individuals whose calves lived to  
315 the winter and then either died before the 1<sup>st</sup> May ("Winter Yeld") or survived ("Milk") were

316 generally less central than those that did not give birth (“True Yield”) or whose calf died  
317 before 1<sup>st</sup> October (“Summer Yield”). Similarly, there were minor age-related decreases in  
318 network centrality for the direct metrics (Group Size, Degree, and Strength; Figure 3C).

319 To investigate spatial patterns of sociality when accounting for our fixed and random effects,  
320 we projected the annual SPDE random effect in two-dimensional space (Figure 4;  
321 Supplementary Figures 5-12). The spatial distributions of network centrality metrics were  
322 highly variable, but direct metrics generally peaked in the centre of the study system and  
323 decreased outwards (Figure 4). Mean Strength was an exception, being lowest in the centre  
324 and increasing outward (Figure 4D); Clustering was patchily distributed, such that no clear  
325 pattern was evident (Figure 4H); and Betweenness was slightly offset, being highest in the  
326 north-northeast of the study area rather than in the central north (Figure 4G). The range of  
327 autocorrelation also varied among metrics; Betweenness and Clustering had notably shorter  
328 ranges than the other metrics (Supplementary Figure 4). We also plotted the spatial fields  
329 through time, revealing substantial variation in the spatial fields across the study period  
330 (Supplementary Figures 5-12).

## 331 Discussion

### 332 The role of spatial behaviour in driving social network structure

333 The position individuals occupy within their social networks can affect many aspects of their  
334 ecology and evolution (Krause *et al.* 2015; Firth *et al.* 2018; Sah *et al.* 2018), and our results  
335 confirm the powerful role of fine-scale spatial context in shaping such traits (e.g. Farine &  
336 Sheldon, 2019; Mourier *et al.*, 2019; Webber & Vander Wal, 2018). Capitalising on our  
337 models’ ability to compare the influence of a wide range of spatial and non-spatial  
338 components, we found that spatial behaviour and environmental context were the most  
339 important determinants of social network centrality -- more so than a suite of individual-level  
340 phenotypes and demographic factors. Individuals with larger ranges and inhabiting higher-  
341 density areas were more central in the social network, revealing the important role of  
342 individual spatial activity levels and location within the broader population structure. As  
343 expected, models were further improved when we incorporated pairwise space sharing and  
344 two-dimensional point locations, demonstrating that an individual’s social network position is  
345 not determined simply by the density of nearby individuals and by its own spatial activity, but  
346 by other aspects of the fine-scale surrounding environment such as microclimate, resource  
347 distribution, and landscape architecture (Spiegel *et al.* 2018; Webber & Vander Wal 2018;  
348 He *et al.* 2019). Reciprocally, individuals may be altering their spatial behaviour, e.g. opting  
349 to share more space or live closer together if they are more socially connected (Firth &  
350 Sheldon 2016; Spiegel *et al.* 2016). As such, we propose that social network studies should

351 more regularly incorporate both space sharing and (temporally varying) point locations in  
352 their statistical approaches to anticipate these effects, alongside specific spatial behaviours  
353 thought to drive social network position. This practice will help to buffer for the fact that the  
354 spatial environment not only correlates with social proximity, but can alter the fabric of the  
355 network itself.

### 356 The landscape of sociality

357 One of the foremost advantages of our approach is the ability to flexibly investigate two-  
358 dimensional spatial patterns of social network centrality. This allowed us to qualitatively  
359 assess the spatial structure of the social network, while providing clues towards the causal  
360 factors. Most notably, betweenness peaked in the north-northeast of the system, likely  
361 because the far northeastern community is relatively isolated from the rest of the population  
362 due to the landscape structure (Figure 2), so that many 'social paths' that traverse the  
363 population (the criteria for betweenness centrality) go through individuals in this intermediate  
364 (north-northeast) area. That is, individuals living in this area are more likely to be connected  
365 to both the far eastern communities and the central and western ones.

366 As expected, direct centrality metrics (group size, degree, and strength) were affected by  
367 local population density, which peaks in the central north study area due to the concentration  
368 of high quality grazing (Clutton-Brock *et al.* 1982). Individuals' resource selection behaviours  
369 increase local density in this area (Clutton-Brock *et al.* 1982), and will increase social  
370 connectivity as a result (Ostfeld *et al.* 1986; Sanchez & Hudgens 2015; Webber & Vander  
371 Wal 2018). This comprises strong evidence for density-related increases in social contact  
372 frequency, and accentuates the vital importance of considering resource distribution, habitat  
373 selection, and population structure when examining social network correlates (Spiegel *et al.*  
374 2016; Webber & Vander Wal 2018; Farine & Sheldon 2019; He *et al.* 2019). However,  
375 because density was accounted for as a fixed effect in the models, the spatial patterns of  
376 location effects for the direct metrics did not strictly follow the spatial pattern of density.  
377 Instead, these metrics peaked in the centre of the study population, demonstrating that  
378 individuals living in this central region are more well-connected *when accounting for*  
379 *population density*. Combining these spatial components allowed us to effectively  
380 differentiate what we do know (that greater population density drives increased social  
381 connectedness) from what we do not (the drivers of greater sociality for individuals in the  
382 central area). Without using the SPDE effect (i.e., relying only on generalised pairwise space  
383 sharing rather than accounting for specific two-dimensional spatial patterns), these insights  
384 into these patterns may have been harder to detect. An alternative method could involve  
385 splitting the population into subpopulations and analysing them separately or comparing  
386 them, but this method has been shown to be less powerful in this population (Albery *et al.*

387 2019), and is ultimately based on arbitrary choices if a population is mixed. The causes of  
388 the spatial distribution of clustering remain unresolved, but the pattern highlights areas  
389 where individuals are connected together in triads or tight cliques, and appears to be  
390 negatively correlated with betweenness (Figure 4). For traits such as this, it is unlikely that a  
391 simpler explanatory variable could be formulated to quantify the spatial-social processes at  
392 play.

393 Regardless of the causes of the spatial patterns, such fine-scale variation across the  
394 landscape holds important ecological consequences, particularly for the more complex  
395 network metrics. For instance, the areas of high clustering may act as ‘incubator’ areas  
396 where cliques can develop new socially influenced behaviours (Centola 2018; Guilbeault *et al.*  
397 2018; Firth 2020) such as cooperative behaviours (Rand *et al.* 2011). The high contact  
398 rates in the northern central areas might sustain high local burdens of directly transmitted  
399 diseases (Cote & Poulin 1995), while individuals inhabiting the high-betweenness  
400 intermediate areas may be important for transmitting novel diseases across the population  
401 as a whole (VanderWaal *et al.* 2014).

#### 402 [Analytical benefits of INLA animal models](#)

403 Analyses using multiple layers of different behaviours are well-suited to extricating space  
404 and sociality in wild animal systems (Silk *et al.* 2018; Webber & Vander Wal 2018; Finn *et al.*  
405 2019), and there is increasing conceptual and analytical overlap with the related field of  
406 movement ecology (Jacoby & Freeman 2016; Mourier *et al.* 2019; Pasquaretta *et al.* 2020).  
407 Notably, many spatial-social studies suffer from the necessity to reduce complex movement  
408 patterns into simpler metrics, which risks losing important information in the process. As  
409 such, recent studies have pushed for researchers to incorporate movement trajectories  
410 themselves into complex network data structures (Mourier *et al.* 2019). Our approach allows  
411 incorporation of multiple dyadic and non-dyadic behavioural measures, and with several  
412 analytical timescales, offering an alternative workaround to this problem. Although other  
413 methods can control for point locations (e.g. using autoregressive processes and  
414 row/column effects; Stopher *et al.* 2012b), INLA models allow greater precision, fit quickly,  
415 and allow incorporation of spatiotemporal structuring. Furthermore, plotting the SPDE effect  
416 in two dimensions, as in Figure 4, gives an easily interpretable and intuitive portrayal of  
417 network traits in space that can be hard to visualise using other methods. For these reasons,  
418 we highly recommend further exploration of INLA animal models as a flexible method with  
419 which to extricate individual, demographic, spatial, and temporal contributors to sociality  
420 where sample sizes are sufficient (Thomson *et al.* 2018; Webber & Vander Wal 2018). In  
421 addition to carrying out network-level manipulations (Daraganova *et al.* 2012; Davis *et al.*  
422 2015; Firth & Sheldon 2016; Farine 2017), researchers concerned about spatial confounding

423 could implement relatively familiar linear models of social behaviour, but with additional  
424 spatial components such as SPDE random effects and similarity matrix variance  
425 components, with trustworthy and interpretable results (Albery *et al.* 2020a).

426 Although space accounted for an overwhelming amount of variation, many non-spatial  
427 factors had substantial effects. The categorical random effect for interannual variation was  
428 substantial, and there were detectable linear annual effects and population size effects, as  
429 expected given the important roles of demography in structuring social networks (Shizuka &  
430 Johnson 2019). Interestingly, there was a substantial positive association with study year  
431 that was not attributable to the growth in population size over the same period. It is possible  
432 that this represents a change in the deer's social phenotypes over time, although the  
433 potential specific mechanisms now would benefit from further examination. Individual-level  
434 factors had weaker contributions to model fit and smaller effect sizes: most notably, genetic  
435 and individual random effects were negligible when spatial autocorrelation was accounted  
436 for, confirming the importance of considering space when assessing heritability  
437 independently of space in this population (Stopher *et al.* 2012a). Nevertheless, individual-  
438 level effects were encouragingly still detectable and significant, particularly for simpler  
439 "direct" metrics. It is possible that more complex social network positions are less  
440 determined by individual social behaviours, particularly for animals with fission-fusion  
441 societies such as the deer; this hypothesis could be tested using similar spatial-social  
442 analyses in a number of other systems. This finding demonstrates that even when spatial  
443 structuring plays a vital role in determining social network structure, controlling for this  
444 structuring analytically can reveal important, conservative individual-level effects. Future  
445 analyses within this population, and potentially other long-term studies, could take  
446 advantage of this framework by including environmental drivers such as food availability and  
447 climatic factors to explain patterns of social connectivity, while further unpicking the causes  
448 of the individual-level trends that we observed.

449

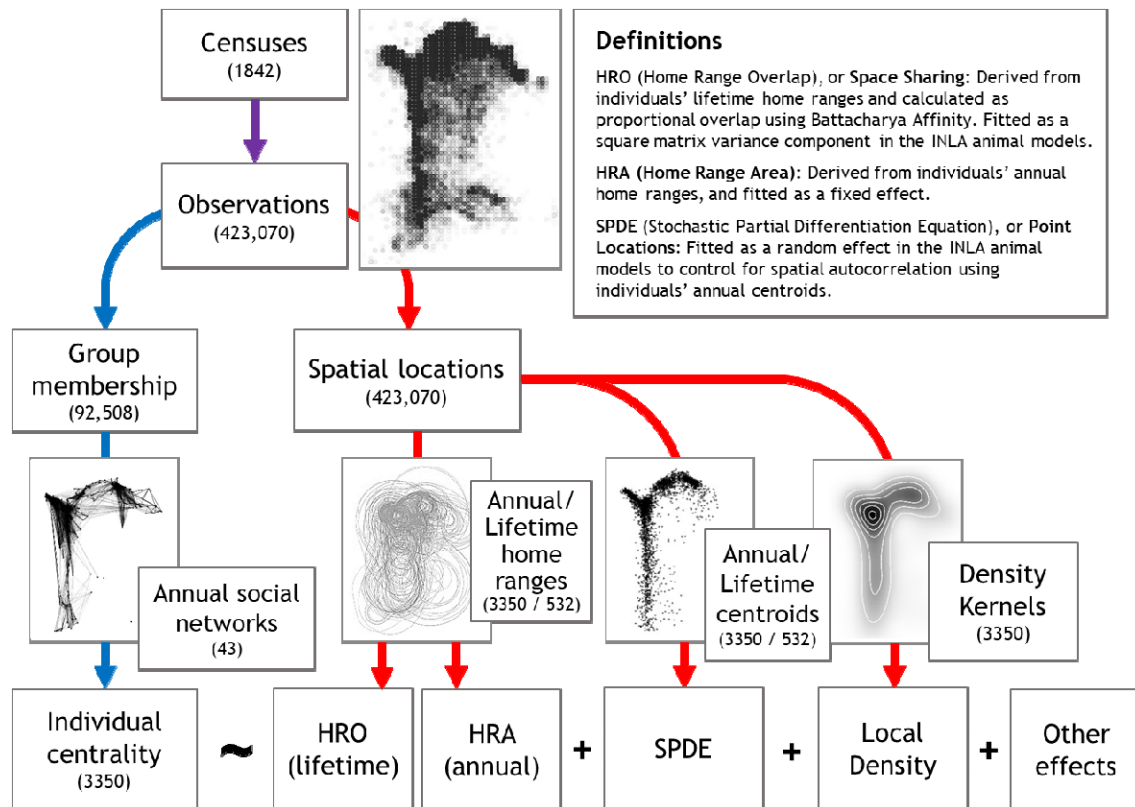

450

451

452

453

454

455

456

457

458

Figure 1: Data processing and analysis pipeline, demonstrating how behavioural census data were collected, used to derive social and spatial behavioural traits, and fitted in INLA animal model GLMMs. Numbers in brackets represent sample sizes, and only include females aged 3+ years. Blue arrows represent social behaviour; red arrows represent spatial behaviours. See methods for the fixed and random effects. The text box displays the definitions for the different spatial effects.

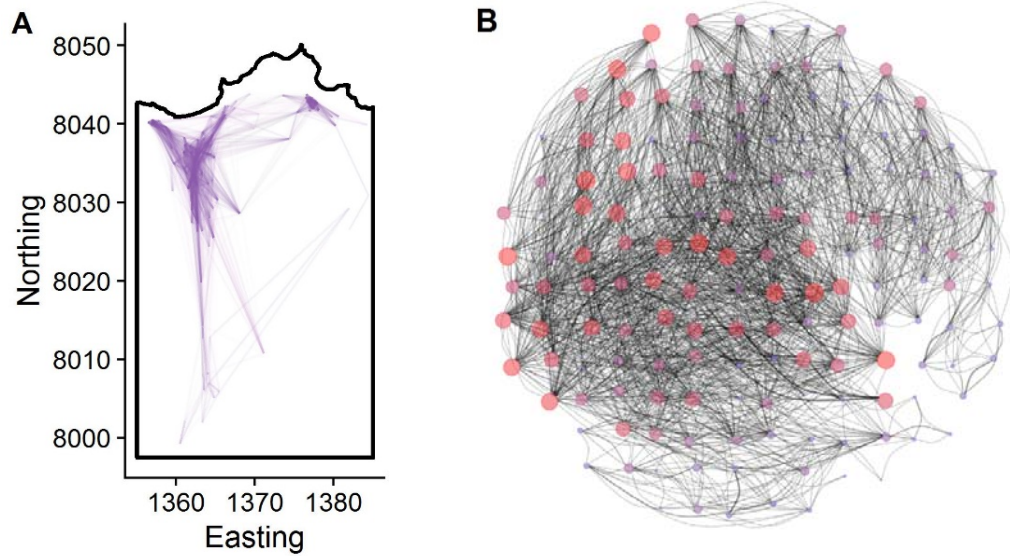

459

460 Figure 2: Spatial structuring of the 2016 social association network as a representative  
461 example. A: the spatial locations (centroids) of individual deer, connected by their social  
462 associations. Line opacity and width are weighted by connection strength. Ten axis units =  
463 1KM. B: the same social network with the nodes positioned in a network spring-layout  
464 (Csardi & Nepusz 2006) and then expanded into an even, circular grid according to their  
465 nearest spatial positions in A. The points' (i.e. nodes') sizes and colours show individuals'  
466 strength centrality (large and red=high strength; small and blue=low strength). Thickness of  
467 the lines (i.e. edges) connecting them shows dyadic association strength between  
468 individuals.  
469

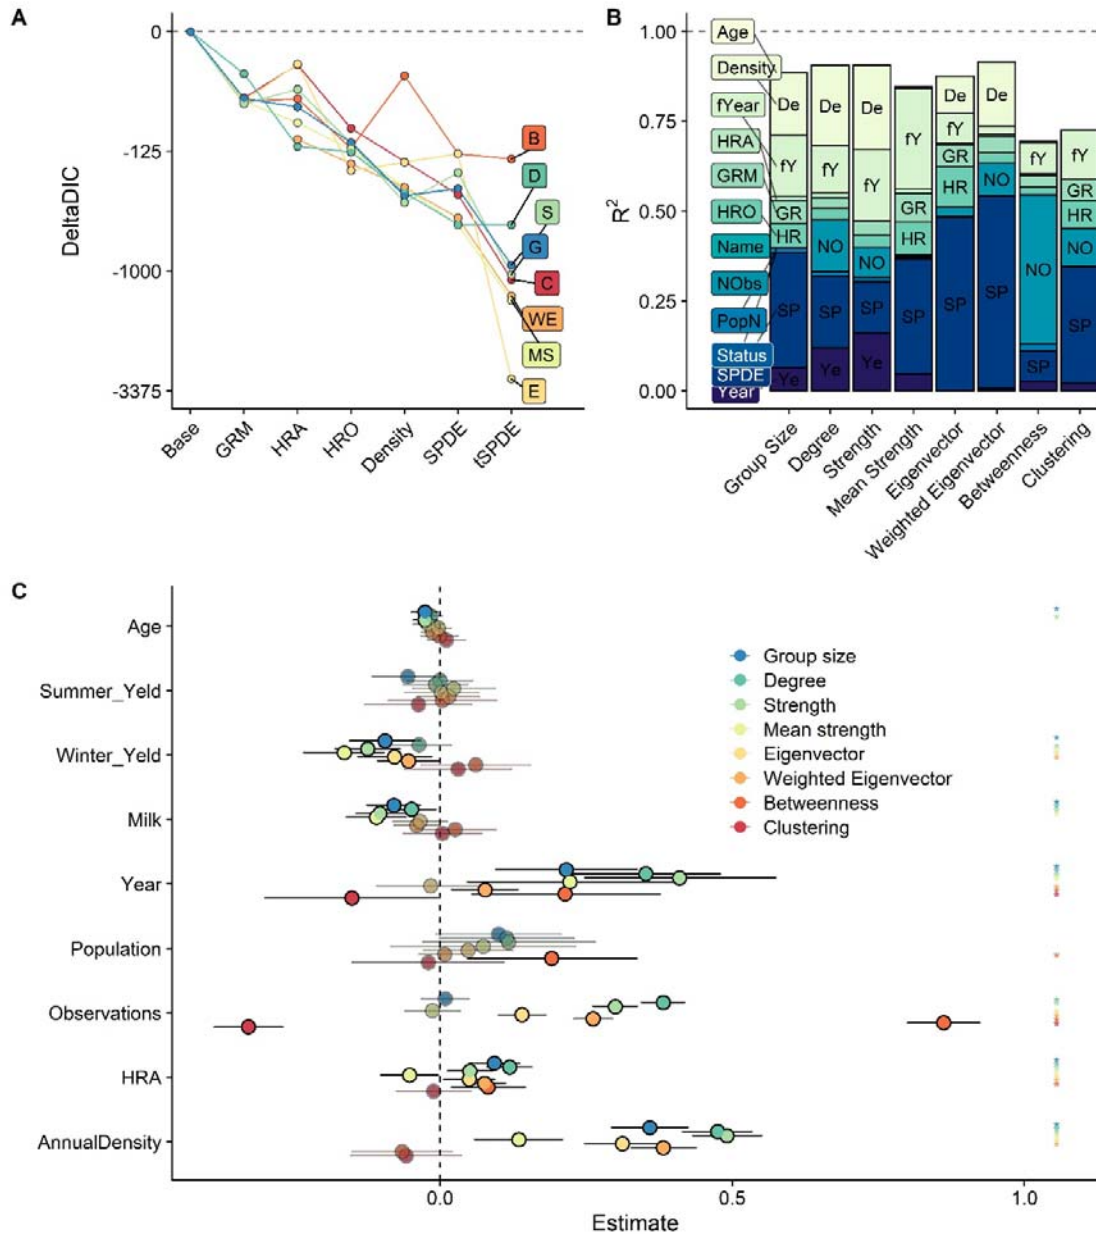

470  
471  
472  
473  
474  
475  
476  
477  
478  
479  
480  
481  
482  
483  
484  
485

Figure 3: Model outputs demonstrating strong effects of spatial and non-spatial drivers on social network positions. A: DIC changes associated with addition of different spatial components, for all eight social network centrality measures. Variables are arranged in order of mean contribution to model fit, which varied little among response variables. Different colours correspond to different network centrality response variables, with the same colour key as panel C. GRM = Genomic Relatedness Matrix. HRA = Home Range Area. HRO = home range overlap. The SPDE models are differentiated into those using annual centroids (“SPDE”) and the version with spatiotemporally varying annual spatial fields (“tSPDE”). B: Variance accounted for by each variable for all eight network position measures, expressed as contribution to  $R^2$  in the annual model (squared correlation between observed and predicted values). Different shades correspond to different variables. fYear = year as a categorical random effect. HRA = Home Range Area. GRM = Genomic Relatedness Matrix. HRO = home range overlap. Name = individual identity. NObs = number of observations (i.e., sampling bias). PopN = population size. Status = reproductive status. SPDE = point location effects estimated using the Stochastic Partial Differentiation Equation effect in the



486 INLA models. For all response variables, individual level effects (Age, Reproductive Status,  
487 Name) had a negligible effect. C: Fixed effect estimates for the models. Fixed effects are  
488 grouped into individual factors (age and three reproductive status effects), annual factors  
489 (continuous time in years since study began, and annual population size), and sampling  
490 factors (observation number). Reproductive status effects are separated into four levels: did  
491 not reproduce (the intercept); calf died in the first few months of life (“Summer Yeld”); calf  
492 died during the winter (“Winter Yeld”); and calf survived to May the following year (“Milk”).  
493 Different colours correspond to different network centrality response variables. Points  
494 represent the posterior mean; error bars denote the 95% credibility intervals for the effects.  
495 Asterisks denote significant variables (i.e., those whose estimates did not overlap with zero).  
496 Significant variables are fully opaque, while non-significant ones are transparent.  
497

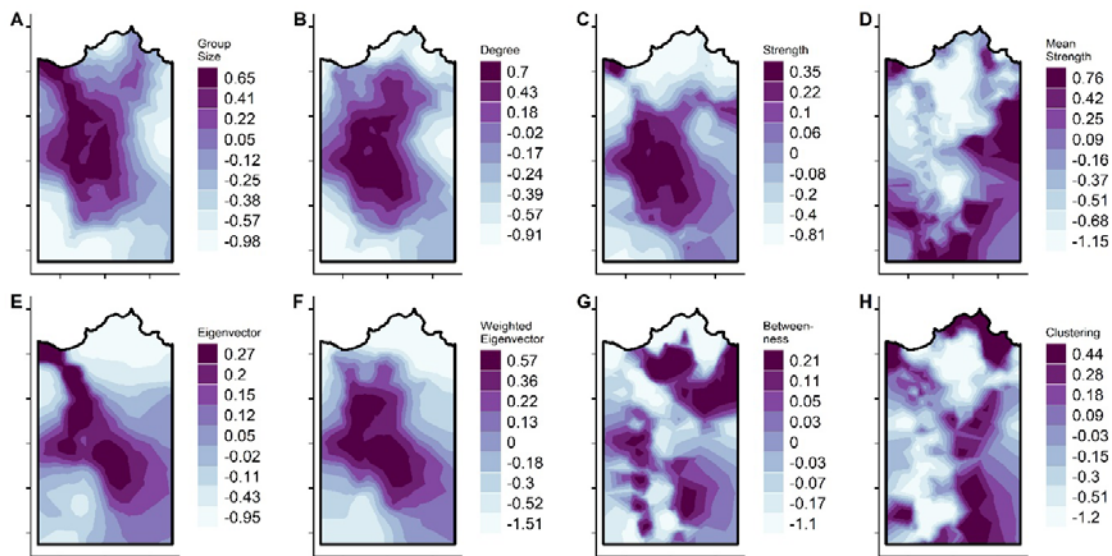

498

499 Figure 4: Spatial fields for the SPDE random effect for each response variable, taken from  
500 the INLA animal models and based on annual centroid point locations. Metrics can be  
501 conceptualised as simpler “direct” metrics (top row) and more complex “indirect” metrics  
502 (bottom row). Darker colours correspond to greater values. Each axis tick corresponds to  
503 1km; for the values associated with the Easting and Northings, see Figure 1.

## 504 Acknowledgements

505 We thank Scottish Natural Heritage and its predecessors for permission to work on the Isle  
506 of Rum NNR. The field project has been supported by grants mainly from the UK NERC with  
507 some additional funding from BBSRC, the Royal Society and ERC. We thank all who have  
508 contributed to the maintenance of the project over time, especially Loeske Kruuk. We thank  
509 multiple dedicated field workers who have contributed to field data collection, especially  
510 Fiona Guinness who collected the first 20 years of census data. GFA was funded by NSF  
511 grant number 1414296, and by a Bruce McEwen Career Development Fellowship the Animal  
512 Models for the Social Dimensions of Health and Aging Research Network (NIH/NIH R24  
513 AG065172). JAF was supported by a fellowship from Merton College and BBSRC  
514 (BB/S009752/1) and funding from NERC (NE/S010335/1). We thank Amy Sweeny and

515 Quinn Webber for comments on the manuscript, as well as Matt Silk, Orr Spiegel, and one  
516 anonymous reviewer.

## 517 References

- 518 Albery, G.F., Becker, D.J., Kenyon, F., Nussey, D.H. & Pemberton, J.M. (2019). The fine-  
519 scale landscape of immunity and parasitism in a wild ungulate population. *Integr.*  
520 *Comp. Biol.*, *icz016*, 1–11.
- 521 Albery, G.F., Kirkpatrick, L., Firth, J.A. & Bansal, S. (2020a). Unifying spatial and social  
522 network analysis in disease ecology. *J. Anim. Ecol.*, 1–17.
- 523 Albery, G.F., Newman, C., Ross, J.G.B., Macdonald, D.W., Bansal, S. & Buesching, C.D.  
524 (2020b). Negative density-dependent parasitism in a group-living carnivore.
- 525 Albery, G.F., Watt, K.A., Keith, R., Morris, S., Morris, A., Kenyon, F., *et al.* (2020c).  
526 Reproduction has different costs for immunity and parasitism in a wild mammal. *Funct.*  
527 *Ecol.*, *34*, 229–239.
- 528 Brent, L.J.N. (2015). Friends of friends: Are indirect connections in social networks important  
529 to animal behaviour? *Anim. Behav.*, *103*, 211–222.
- 530 Cairns, S.J. & Schwager, S.J. (1987). A comparison of association indices. *Anim. Behav.*,  
531 *35*, 1454–1469.
- 532 Calenge, C. (2011). *Home range estimation in R: the adehabitatHR package*. Available at:  
533 <https://cran.r-project.org/web/packages/adehabitatHR/index.html>. Last accessed 10  
534 March 2020.
- 535 Castles, M., Heinsohn, R., Marshall, H.H., Lee, A.E.G., Cowlshaw, G. & Carter, A.J. (2014).  
536 Social networks created with different techniques are not comparable. *Anim. Behav.*,  
537 *96*, 59–67.
- 538 Centola, D. (2018). *How Behavior Spreads: The Science of Complex Contagions*. Princeton  
539 Analytical Sociology Series.
- 540 Clutton-Brock, T.H., Albon, S.D. & Guinness, F.E. (1989). Fitness costs of gestation and  
541 lactation in wild mammals. *Nature*, *337*, 260–262.
- 542 Clutton-Brock, T.H., Guinness, F.E. & Albon, S.D. (1982). *Red Deer: Behavior and Ecology*  
543 *of Two Sexes*. University of Chicago Press, Chicago, IL.
- 544 Cote, I.M. & Poulin, R. (1995). Parasitism and group size in social animals: A meta-analysis.  
545 *Behav. Ecol.*, *6*, 159–165.

- 546 Croft, D.P., James, R. & Krause, J. (2008). *Exploring animal social networks*. Princeton  
547 University Press.
- 548 Csardi, G. & Nepusz, T. (2006). The igraph software package for complex network research.  
549 *InterJournal Complex Syst.*, Complex Sy, 1695.
- 550 Daraganova, G., Pattison, P., Koskinen, J., Mitchell, B., Bill, A., Watts, M., *et al.* (2012).  
551 Networks and geography: Modelling community network structures as the outcome of  
552 both spatial and network processes. *Soc. Networks*, 34, 6–17.
- 553 Davis, S., Abbasi, B., Shah, S., Telfer, S. & Begon, M. (2015). Spatial analyses of wildlife  
554 contact networks. *J. R. Soc. Interface*, 12.
- 555 Farine, D.R. (2017). A guide to null models for animal social network analysis. *Methods Ecol.*  
556 *Evol.*, 8, 1309–1320.
- 557 Farine, D.R. & Sheldon, B.C. (2019). Stable multi-level social structure is maintained by  
558 habitat geometry in a wild bird population. *bioRxiv*, 1–30.
- 559 Finn, K.R., Silk, M.J., Porter, M.A. & Pinter-Wollman, N. (2019). The use of multilayer  
560 network analysis across social scales in animal behaviour. *Anim. Behav.*, 149, 7–22.
- 561 Firth, J.A. (2020). Considering complexity: animal social networks and behavioural  
562 contagions. *Trends Ecol. Evol.*, 35, 100–104.
- 563 Firth, J.A., Cole, E.F., Ioannou, C.C., Quinn, J.L., Aplin, L.M., Culina, A., *et al.* (2018).  
564 Personality shapes pair bonding in a wild bird social system. *Nat. Ecol. Evol.*, 2, 1696–  
565 1699.
- 566 Firth, J.A. & Sheldon, B.C. (2016). Social carry-over effects underpin trans-seasonally linked  
567 structure in a wild bird population. *Ecol. Lett.*, 19, 1324–1332.
- 568 Firth, J.A., Voelkl, B., Crates, R.A., Aplin, L.M., Biro, D., Croft, D.P., *et al.* (2017). Wild birds  
569 respond to flockmate loss by increasing their social network associations to others.  
570 *Proc. R. Soc. B Biol. Sci.*, 284.
- 571 Franks, D.W., Ruxton, G.D. & James, R. (2010). Sampling animal association networks with  
572 the gambit of the group. *Behav. Ecol. Sociobiol.*, 64, 493–503.
- 573 Froy, H., Börger, L., Regan, C.E., Morris, A., Morris, S., Pilkington, J.G., *et al.* (2018).  
574 Declining home range area predicts reduced late-life survival in two wild ungulate  
575 populations. *Ecol. Lett.*, 21, 1001–1009.
- 576 Froy, H., Walling, C.A., Pemberton, J.M., Clutton-brock, T.H. & Kruuk, L.E.B. (2016).

- 577 Relative costs of offspring sex and offspring survival in a polygynous mammal. *Biol.*  
578 *Lett.*, 12, 20160417.
- 579 Guilbeault, D., Becker, J. & Centola, D. (2018). Complex Contagions: A Decade in Review.  
580 pp. 3–25.
- 581 He, P., Maldonado-chaparro, A.A. & Farine, D.R. (2019). The role of habitat configuration in  
582 shaping social structure: a gap in studies of animal social complexity. *Behav. Ecol.*  
583 *Sociobiol.*, 73.
- 584 Holand, A.M., Steinsland, I., Martino, S. & Jensen, H. (2013). Animal Models and Integrated  
585 Nested Laplace Approximations. *Genes/Genomes/Genetics*, 3, 1241–1251.
- 586 Huisman, J., Kruuk, L.E.B., Ellis, P.A., Clutton-Brock, T.H. & Pemberton, J.M. (2016).  
587 Inbreeding depression across the lifespan in a wild mammal population. *Proc. Natl.*  
588 *Acad. Sci.*, 113, 201518046.
- 589 Jacoby, D.M.P. & Freeman, R. (2016). Emerging Network-Based Tools in Movement  
590 Ecology. *Trends Ecol. Evol.*, 31, 301–314.
- 591 Krause, J., James, R., Franks, D.W. & Croft, D.P. (2015). *Animal social networks*. Oxford  
592 University Press, Oxford, UK.
- 593 Kruuk, L.E.B. (2004). Estimating genetic parameters in natural populations using the “animal  
594 model.” *Philos. Trans. R. Soc. B Biol. Sci.*, 359, 873–890.
- 595 Lindgren, F. & Rue, H. (2015). Bayesian Spatial Modelling with R-INLA. *J. Stat. Softw.*, 63,  
596 1–25.
- 597 Lindgren, F., Rue, H. & Lindstrom, J. (2011). An explicit link between Gaussian fields and  
598 Gaussian Markov random fields: the stochastic partial differential equation approach. *J.*  
599 *R. Stat. Soc. B*, 73, 423–498.
- 600 Mourier, J., Lédée, E.J.I. & Jacoby, D.M.P. (2019). A multilayer perspective for inferring  
601 spatial and social functioning in animal movement networks. *bioRxiv*.
- 602 Ostfeld, R.S., Lidicker, W.Z., Heske, E.J., Ostfeld, R.S., Lidicker, W.Z. & Heske, E.J. (1986).  
603 The Relationship between Habitat Heterogeneity, Space Use, and Demography in a  
604 Population of California Voles. *J. Mammal.*, 45, 433–442.
- 605 Pasquaretta, C., Dubois, T., Gomez-Moracho, T., Perilhon Delepouille, V., Le Loc’h, G.,  
606 Heeb, P., *et al.* (2020). Analysis of temporal patterns in animal movement networks.  
607 *Methods Ecol. Evol.*, 0–1.

- 608 Rand, D.G., Arbesman, S. & Christakis, N.A. (2011). Dynamic social networks promote  
609 cooperation in experiments with humans. *Proc. Natl. Acad. Sci. U. S. A.*, 108, 19193–  
610 19198.
- 611 Regan, C.E., Pilkington, J.G., Berenos, C., Pemberton, J.M., Smiseth, P.T. & Wilson, A.J.  
612 (2016). Accounting for female space sharing in St. Kilda Soay sheep (*Ovis aries*)  
613 results in little change in heritability estimates. *J. Evol. Biol.*, 30, 96–111.
- 614 Robert, K., Garant, D. & Pelletier, F. (2012). Keep in touch: Does spatial overlap correlate  
615 with contact rate frequency? *J. Wildl. Manage.*, 76, 1670–1675.
- 616 Sah, P., Mann, J. & Bansal, S. (2018). Disease implications of animal social network  
617 structure: A synthesis across social systems. *J. Anim. Ecol.*, 87, 546–558.
- 618 Sanchez, J.N. & Hudgens, B.R. (2015). Interactions between density, home range  
619 behaviors, and contact rates in the Channel Island fox (*Urocyon littoralis*). *Ecol. Evol.*,  
620 5, 2466–2477.
- 621 Shizuka, D. & Johnson, A.E. (2019). How demographic processes shape animal social  
622 networks. *Behav. Ecol.*, 1–11.
- 623 Silk, M.J., Finn, K.R., Porter, M.A. & Pinter-Wollman, N. (2018). Can Multilayer Networks  
624 Advance Animal Behavior Research? *Trends Ecol. Evol.*, 33, 376–378.
- 625 Silk, M.J., Hodgson, D., Rozins, C., Croft, D., Delahay, R., Boots, M., *et al.* (2019).  
626 Integrating social behaviour, demography and disease dynamics in network models:  
627 applications to disease management in declining wildlife populations. *Philos. Trans. R.*  
628 *Soc. B*, 374, 20180211.
- 629 Sosa, S., Sueur, C. & Puga-Gonzalez, I. (2020). Network measures in animal social network  
630 analysis: their strengths, limits, interpretations and uses. *Methods Ecol. Evol.*
- 631 Spiegel, O., Leu, S.T., Sih, A. & Bull, C.M. (2016). Socially interacting or indifferent  
632 neighbours? Randomization of movement paths to tease apart social preference and  
633 spatial constraints. *Methods Ecol. Evol.*, 971–979.
- 634 Spiegel, O., Sih, A., Leu, S.T. & Bull, C.M. (2018). Where should we meet? Mapping social  
635 network interactions of sleepy lizards shows sex-dependent social network structure.  
636 *Anim. Behav.*, 136, 207–215.
- 637 Stopher, K. V., Nussey, D.H., Guinness, F., Morris, A., Pemberton, J.M., Clutton-Brock, T.H.,  
638 *et al.* (2012a). Re-mating across years and intralineaage polygyny are associated with  
639 greater than expected levels of inbreeding in wild red deer. *J. Evol. Biol.*, 25, 2457–

640 2469.

641 Stopher, K. V, Walling, C. a, Morris, A., Guinness, F.E., Clutton-brock, T.H., Pemberton,  
642 J.M., *et al.* (2012b). Shared spatial effects on quantitative genetic parameters:  
643 accounting for spatial autocorrelation and home range overlap reduces estimates of  
644 heritability in wild red deer. *Evolution*, 66, 2411–26.

645 Thomson, C.E., Winney, I.S., Salles, O.C. & Pujol, B. (2018). A guide to using a Multiple-  
646 Matrix animal model to disentangle genetic and nongenetic causes of phenotypic  
647 variance. *PLoS One*, 13, e0197720.

648 VanderWaal, K.L., Atwill, E.R., Isbell, L.A. & McCowan, B. (2014). Linking social and  
649 pathogen transmission networks using microbial genetics in giraffe (*Giraffa*  
650 *camelopardalis*). *J. Anim. Ecol.*, 83, 406–414.

651 Vander Wal, E., Laforge, M.P. & McLoughlin, P.D. (2014). Density dependence in social  
652 behaviour: Home range overlap and density interacts to affect conspecific encounter  
653 rates in a gregarious ungulate. *Behav. Ecol. Sociobiol.*, 68, 383–390.

654 Webber, Q.M.R. & Vander Wal, E. (2018). An evolutionary framework outlining the  
655 integration of individual social and spatial ecology. *J. Anim. Ecol.*, 87, 113–127.

656 Whitehead, H. (2008). *Analyzing animal societies*: quantitative methods for vertebrate  
657 social analysis. University of Chicago Press.

658 Yang, J., Lee, S.H., Goddard, M.E. & Visscher, P.M. (2011). GCTA: A Tool for Genome-wide  
659 Complex Trait Analysis. *Am. J. Hum. Genet.*, 88, 76.

660 Zuur, A.F., Ieno, E.N. & Saveliev, A.A. (2017). *Beginner's guide to spatial, temporal, and*  
661 *spatial-temporal ecological data analysis with R-INLA*. Highstat Ltd.

662

663

664

665

666

667

668

669

670  
671

Supplementary Figures for Albery et al:

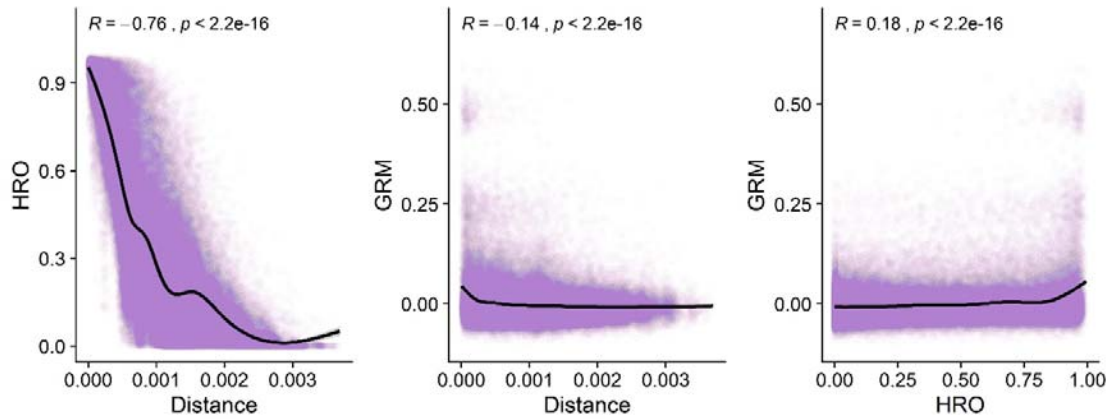

672

673 Supplementary Figure 1: Correlation among pairwise values in lifetime point location distances, home  
674 range overlap matrix, and genomic relatedness matrix. The data have been fitted with a Generalised  
675 Additive Model (GAM) smooth.

676

677

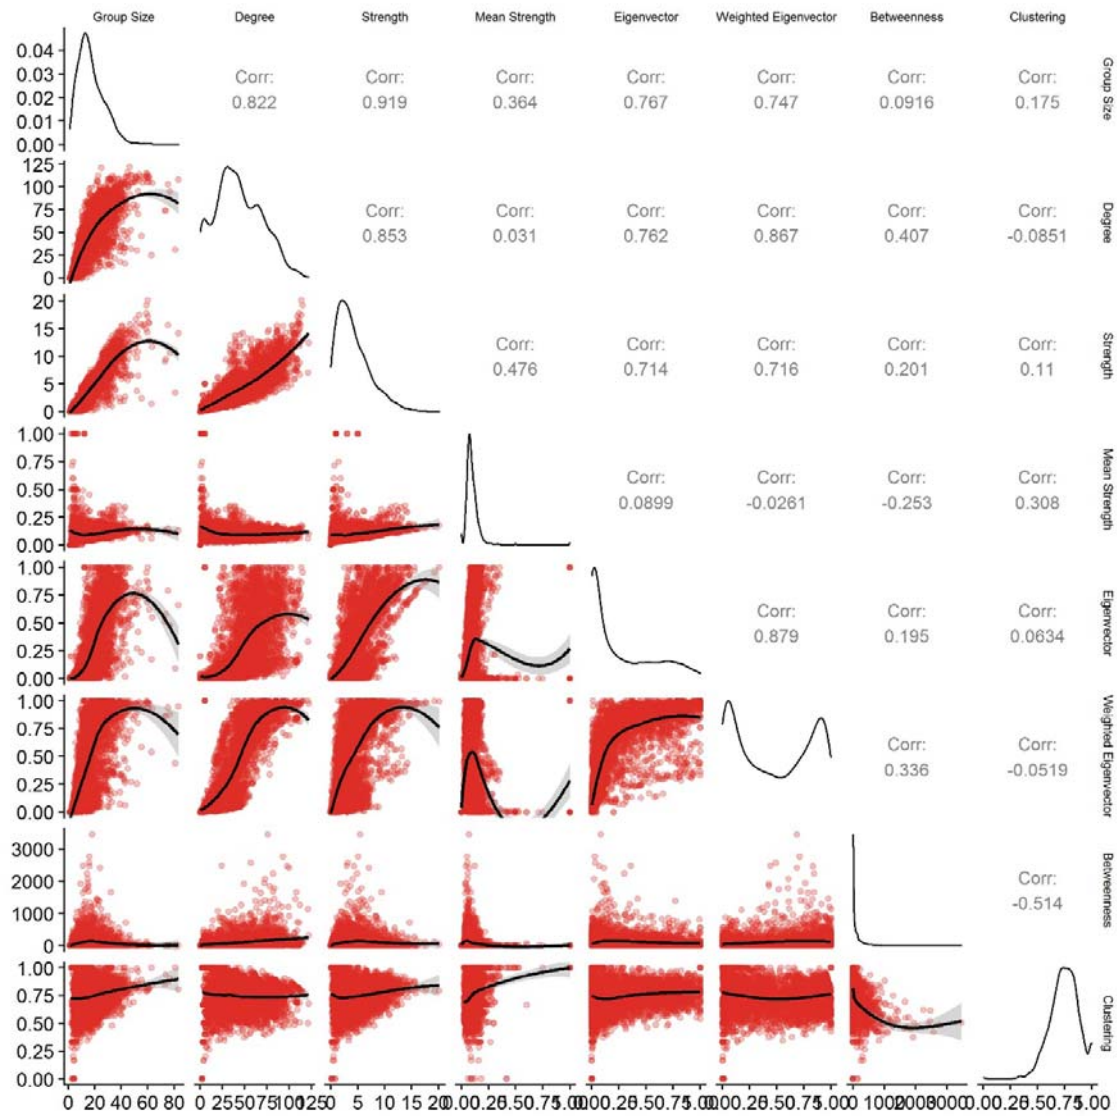

678

679

680

681

Supplementary Figure 2: Pairwise correlations among network position response variables. Values were transformed, scaled to have a mean of 0 and a standard deviation of 1, with outliers removed, before analysis. The data have been fitted with a Generalised Additive Model (GAM) smooth.



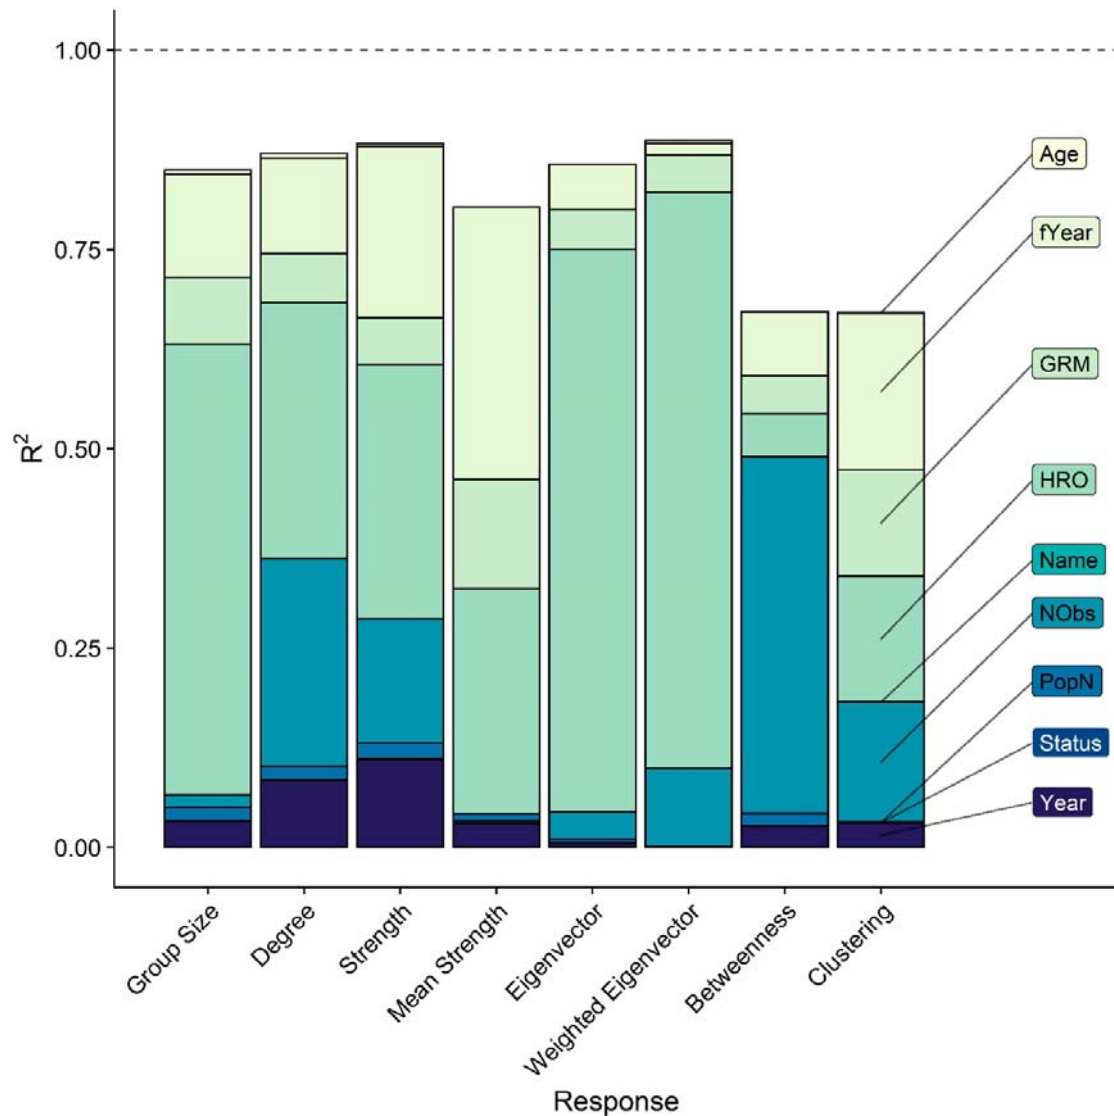

682

683       Supplementary Figure 3: Variance accounted for by each variable for all eight network position  
684 measures, expressed as contribution to R<sup>2</sup> in the models with home range overlap. This output differs  
685 from Figure 3B in the main text because the model did not include the SPDE random effect. Different  
686 shades correspond to different variables. fYear = year as a categorical random effect. GRM =  
687 Genomic Relatedness Matrix. HRO = home range overlap. Name = individual identity. NObs =  
688 number of observations (i.e., sampling bias). PopN = population size. Status = reproductive status.

689       For all response variables, individual level variables (Age, Reproductive Status, Identity) had a  
690 negligible effect.

691

692

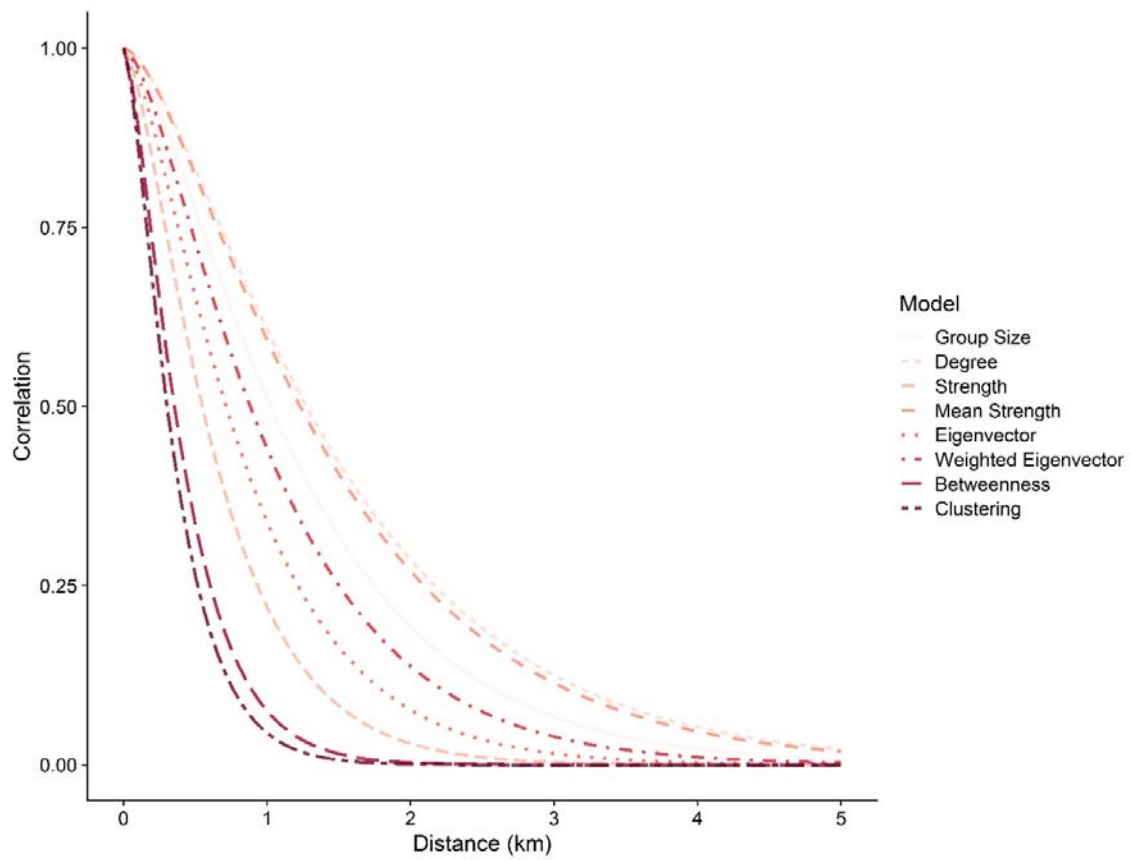

693

694 Supplementary Figure 4: The INLA SPDE autocorrelation ranges for each response variable. Different  
695 shades and line types correspond to different response variables. The X axis is in kilometres.

696

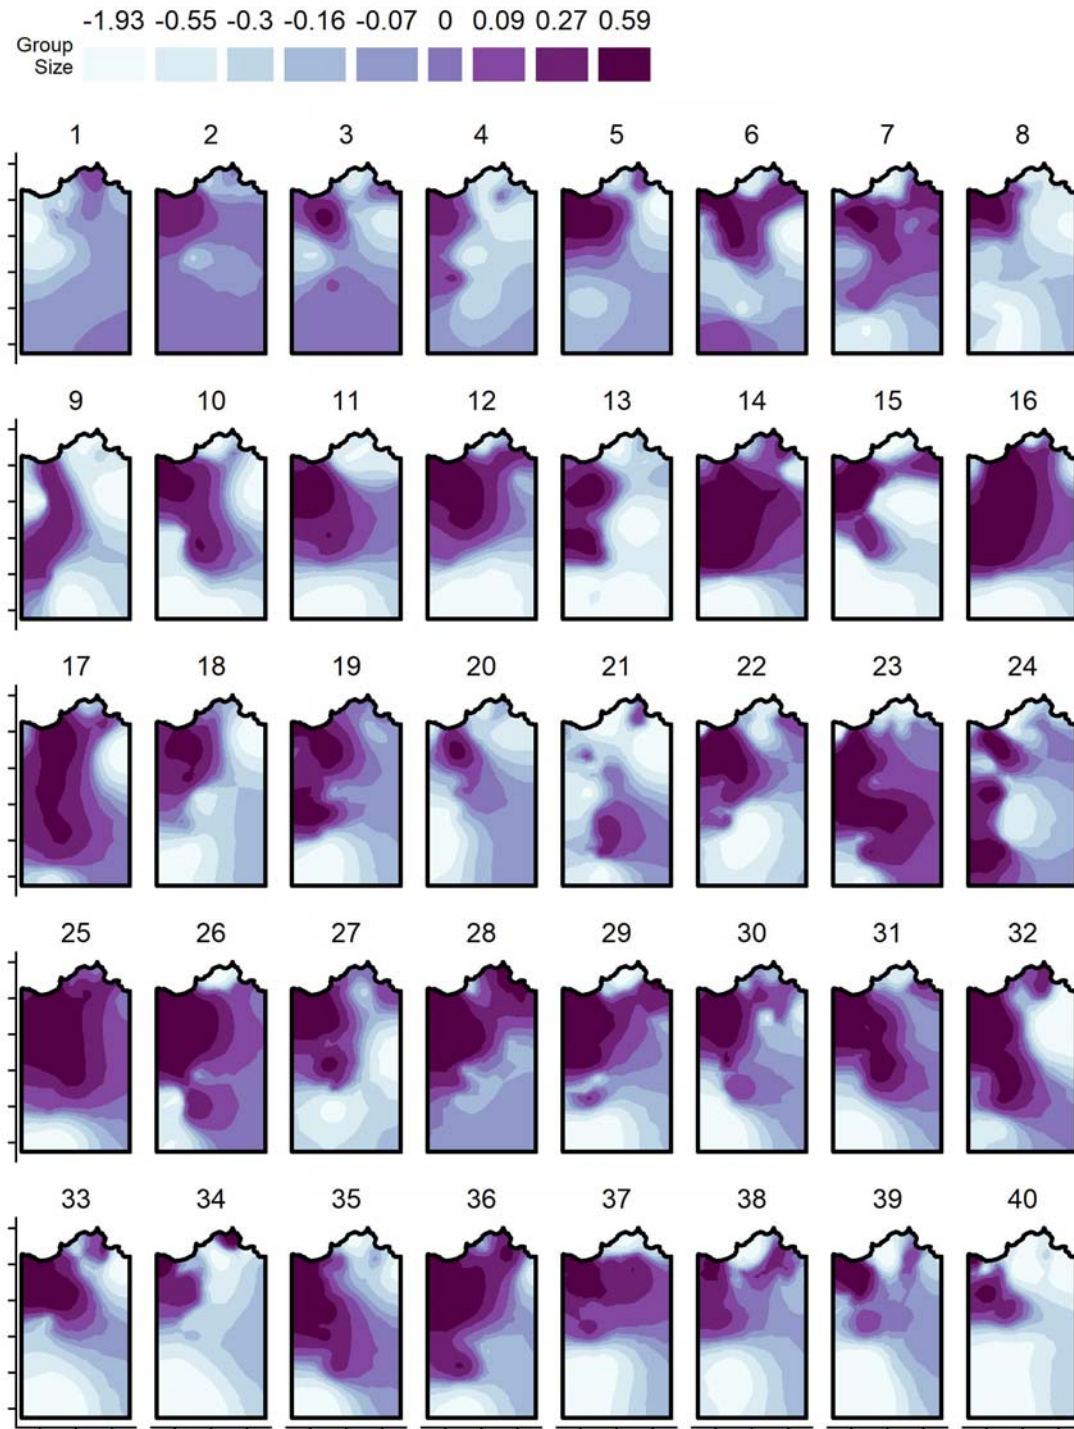

697

698 Supplementary Figure 5: Annual spatial fields for the SPDE random effect for group size, taken from  
699 the INLA animal models and based on annual centroid point locations. Darker colours correspond to  
700 greater values. Each axis tick corresponds to 1km distance; for the values associated with the Easting  
701 and Northings, see Figure 1 in the main text.

702

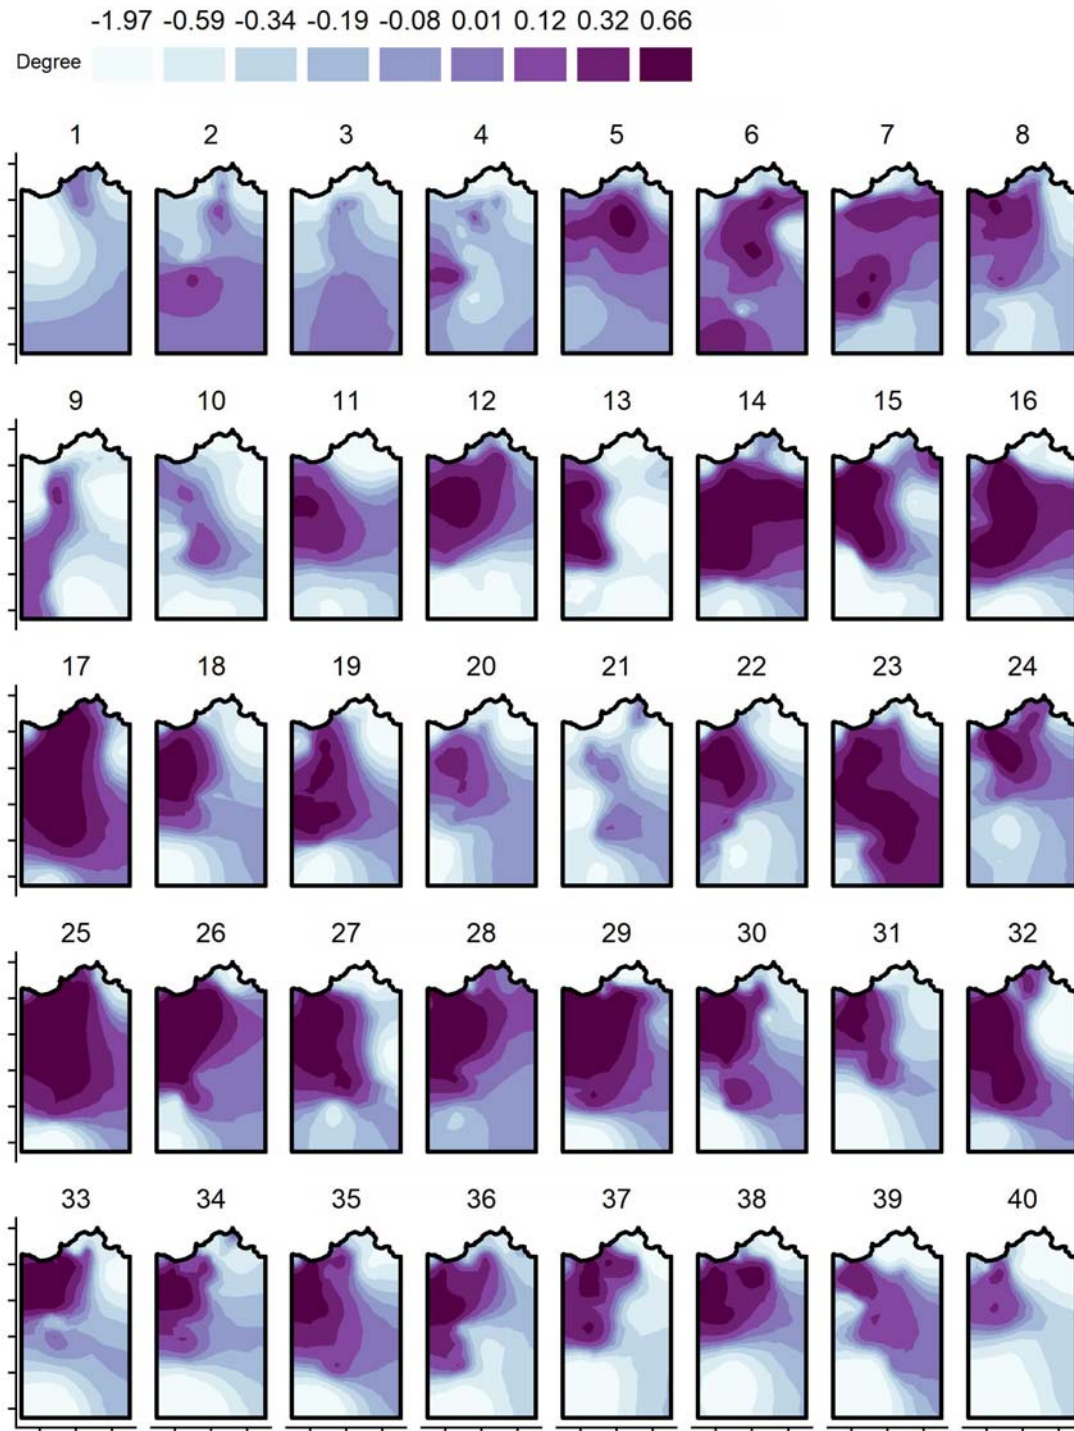

703

704 Supplementary Figure 6: Annual spatial fields for the SPDE random effect for degree centrality, taken  
705 from the INLA animal models and based on annual centroid point locations. Darker colours  
706 correspond to greater values. Each axis tick corresponds to 1km distance; for the values associated  
707 with the Easting and Northings, see Figure 1 in the main text.

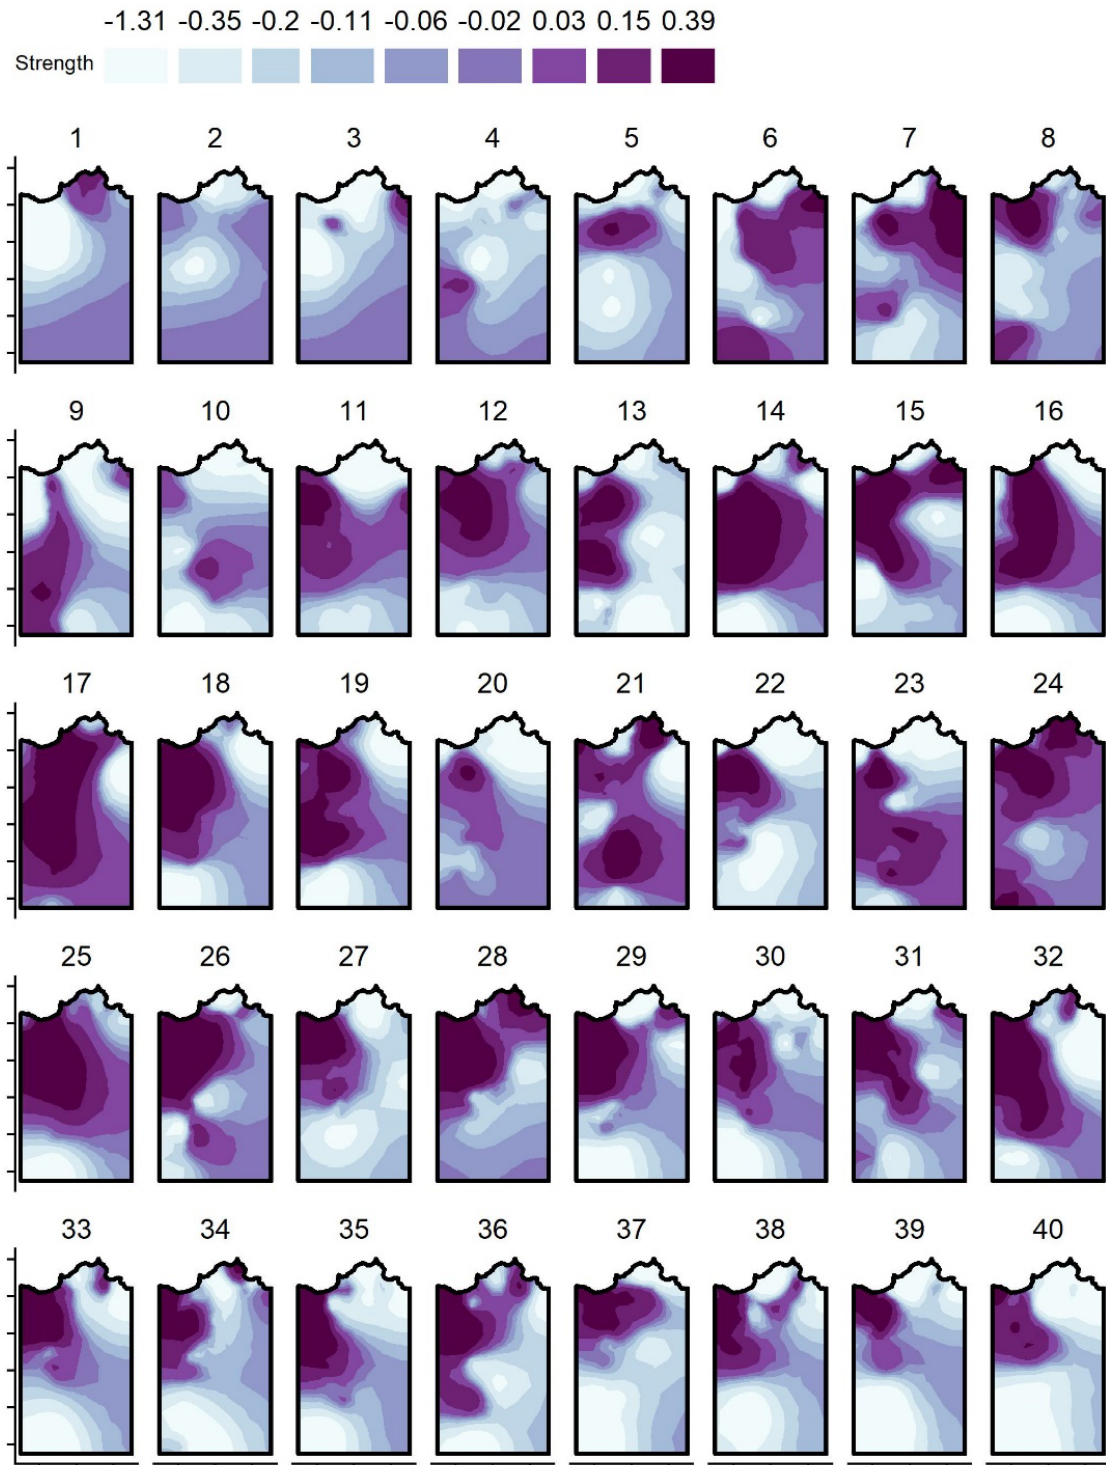

708

709       Supplementary Figure 7: Annual spatial fields for the SPDE random effect for strength centrality,  
710       taken from the INLA animal models and based on annual centroid point locations. Darker colours  
711       correspond to greater values. Each axis tick corresponds to 1km distance; for the values associated  
712       with the Easting and Northings, see Figure 1 in the main text.

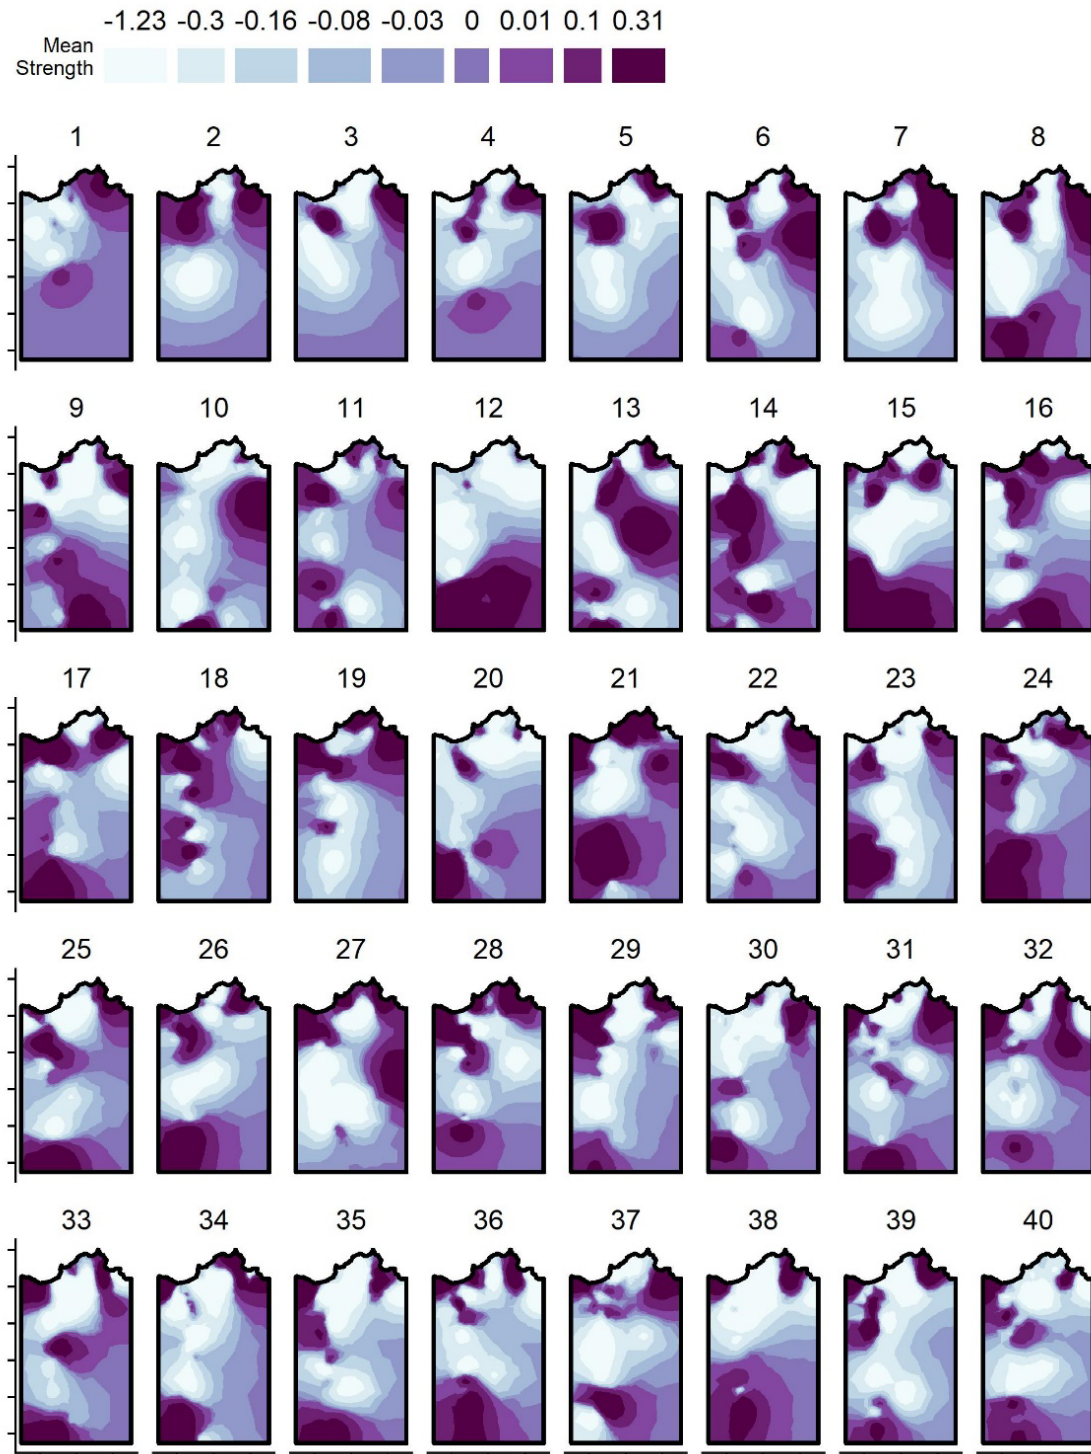

713

714

715

716

717

Supplementary Figure 8: Annual spatial fields for the SPDE random effect for mean strength centrality, taken from the INLA animal models and based on annual centroid point locations. Darker colours correspond to greater values. Each axis tick corresponds to 1km distance; for the values associated with the Easting and Northings, see Figure 1 in the main text.

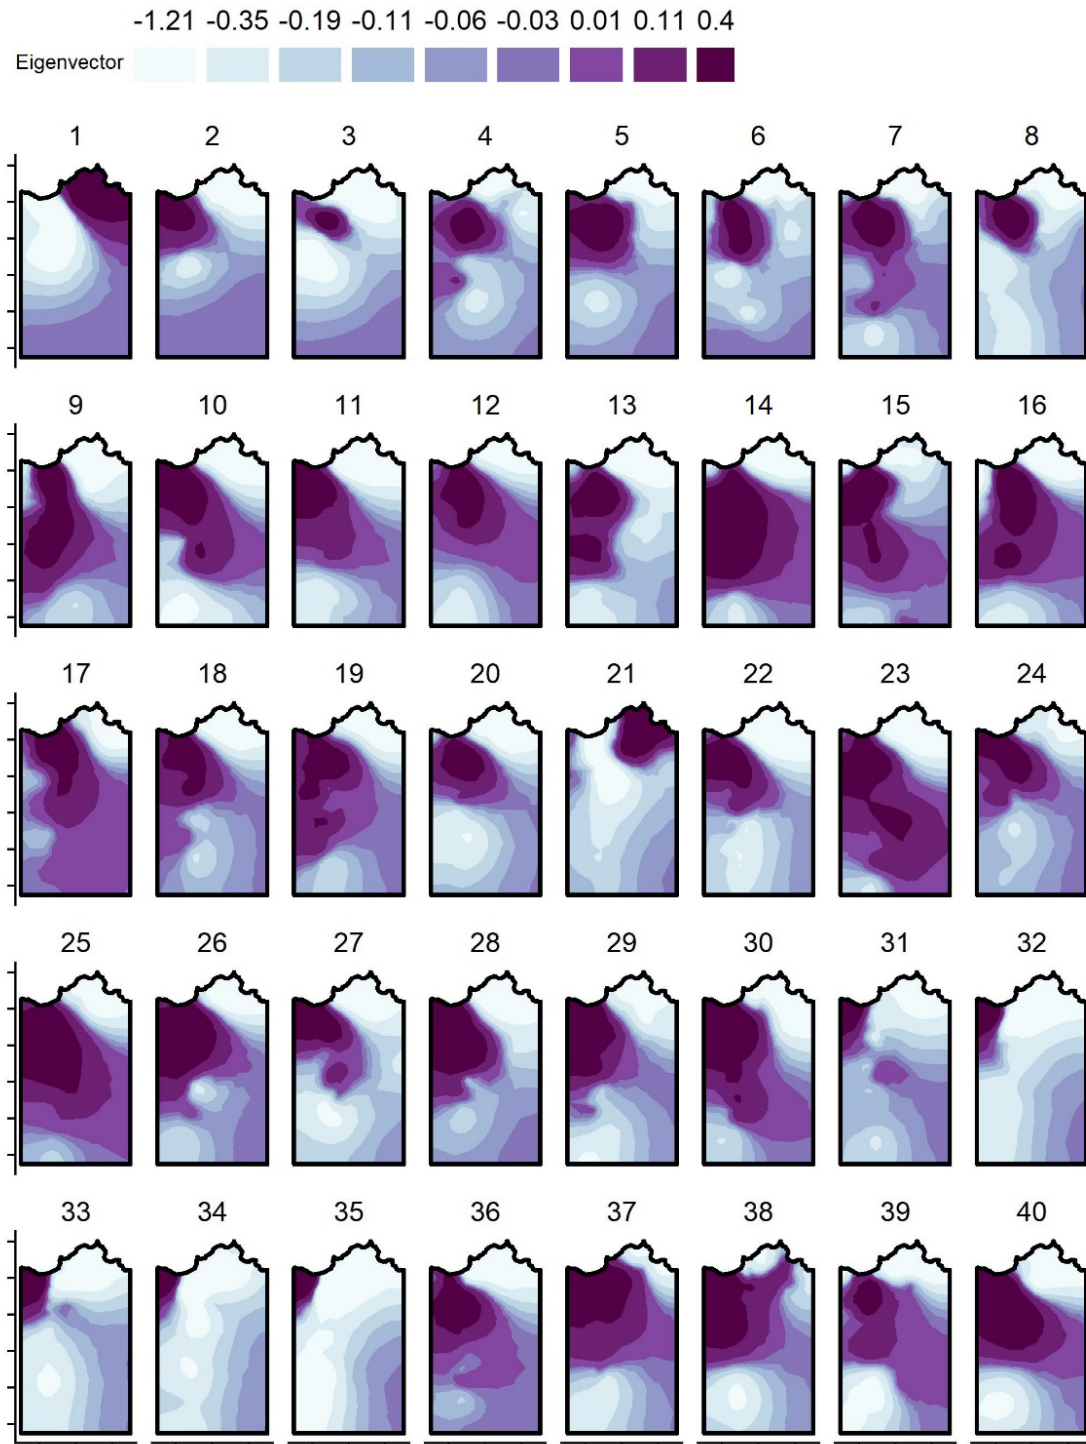

718

719 Supplementary Figure 9: Annual spatial fields for the SPDE random effect for Eigenvector centrality,  
720 taken from the INLA animal models and based on annual centroid point locations. Darker colours  
721 correspond to greater values. Each axis tick corresponds to 1km distance; for the values associated  
722 with the Easting and Northings, see Figure 1 in the main text.

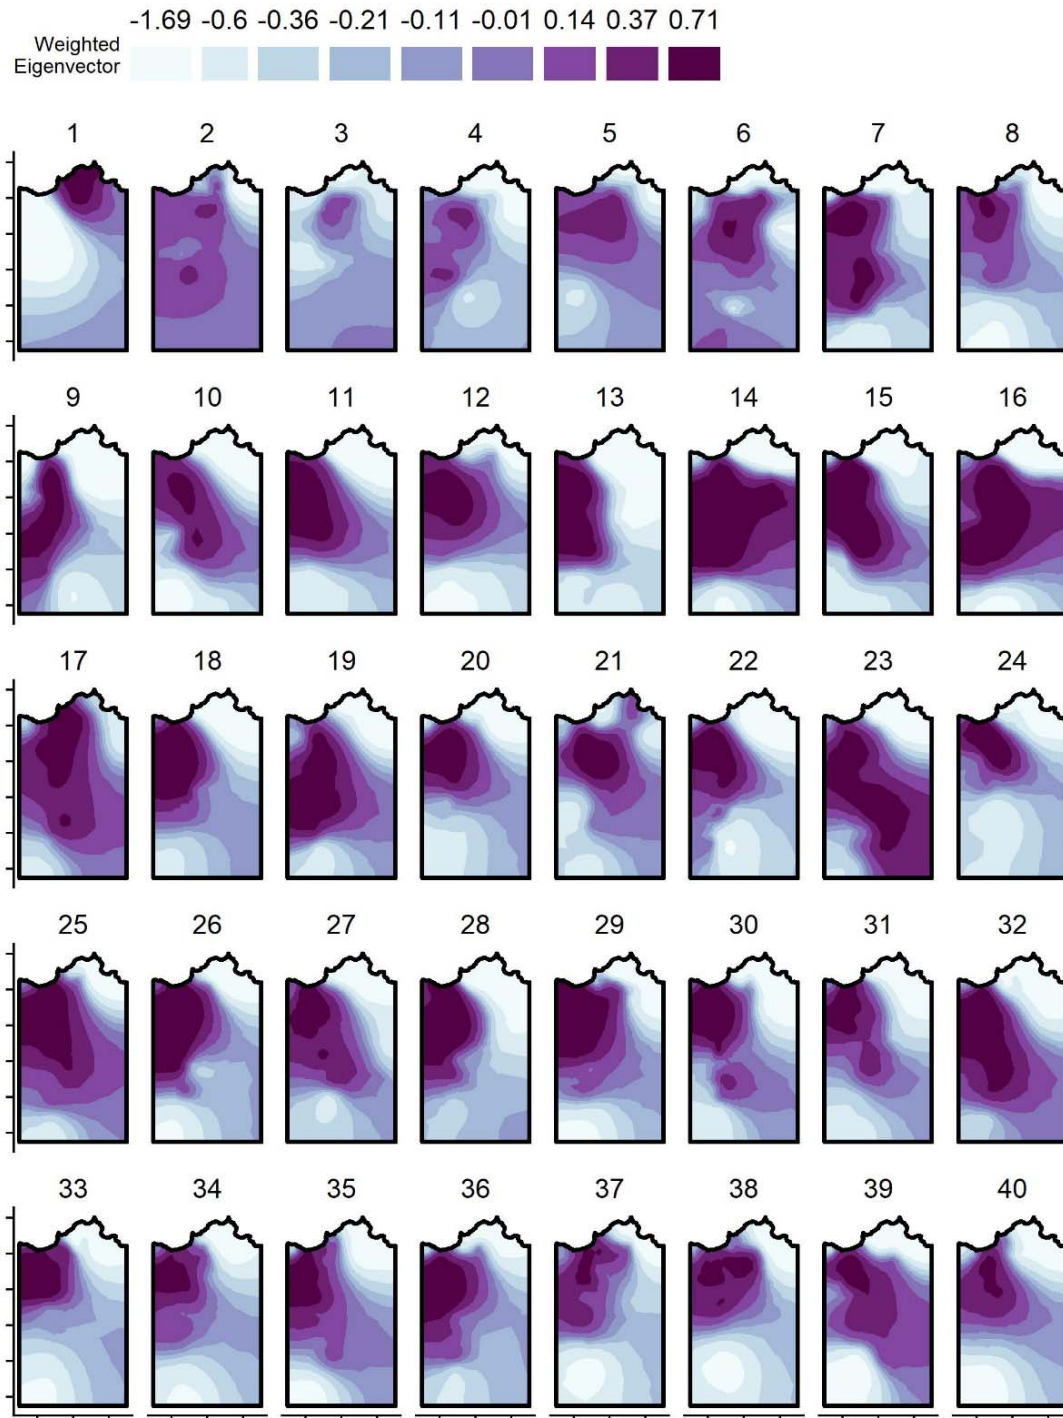

723

724 Supplementary Figure 10: Annual spatial fields for the SPDE random effect for weighted Eigenvector  
725 centrality, taken from the INLA animal models and based on annual centroid point locations. Darker  
726 colours correspond to greater values. Each axis tick corresponds to 1km distance; for the values  
727 associated with the Easting and Northings, see Figure 1 in the main text.



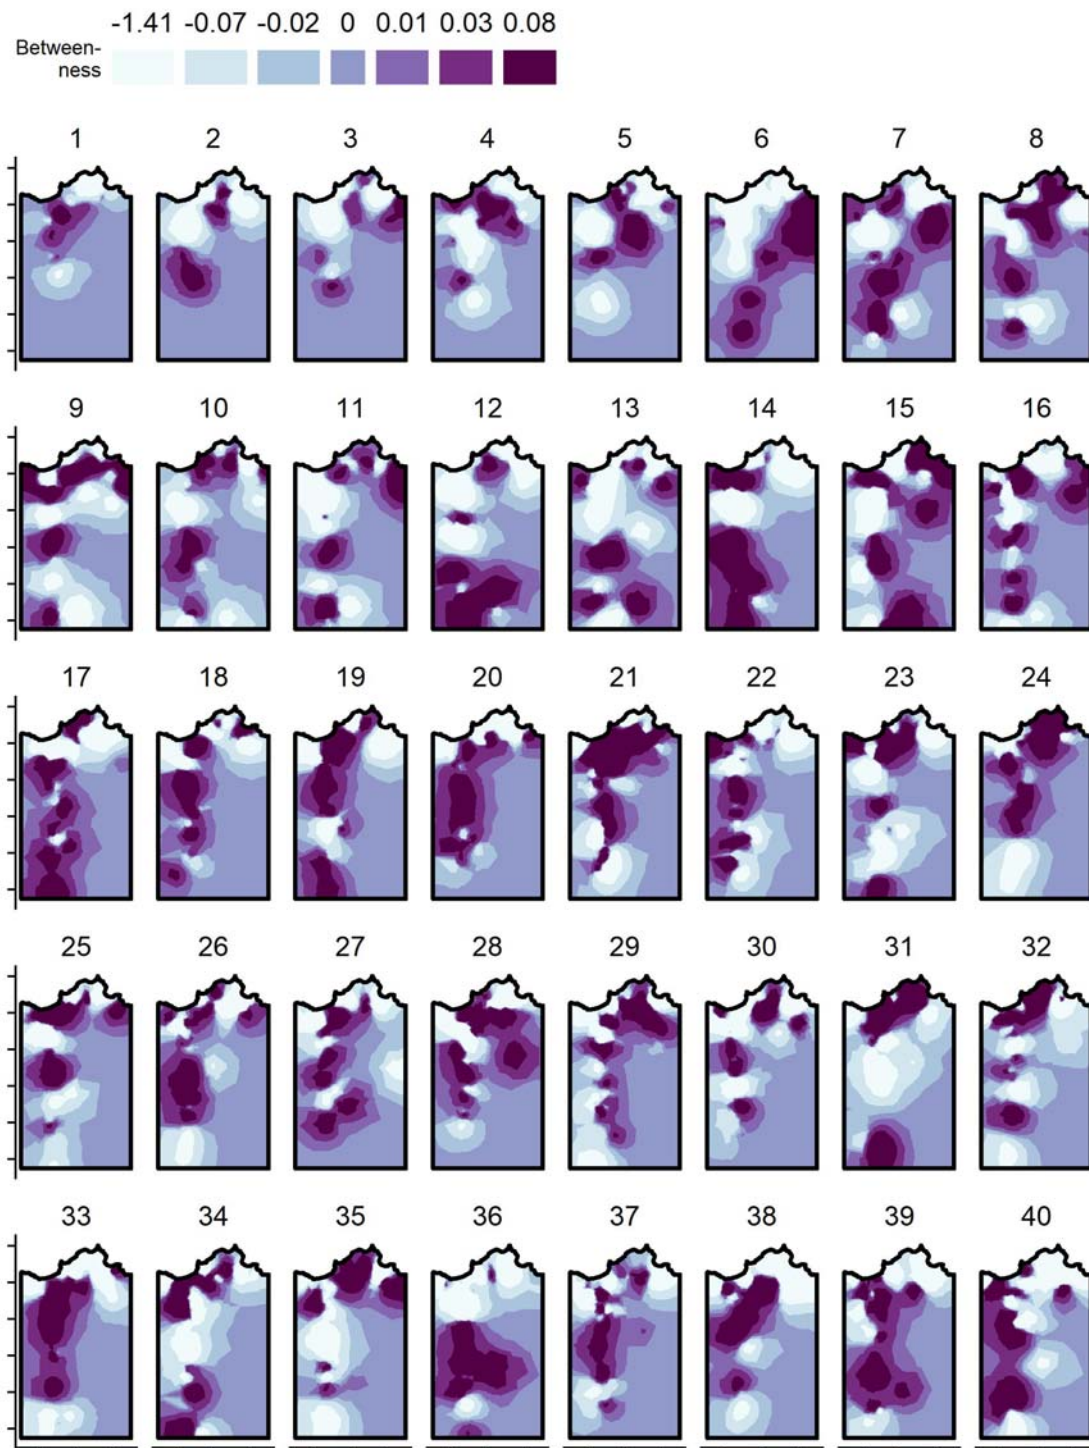

728

729

730

731

732

Supplementary Figure 11: Annual spatial fields for the SPDE random effect for betweenness centrality, taken from the INLA animal models and based on annual centroid point locations. Darker colours correspond to greater values. Each axis tick corresponds to 1km distance; for the values associated with the Easting and Northings, see Figure 1 in the main text.

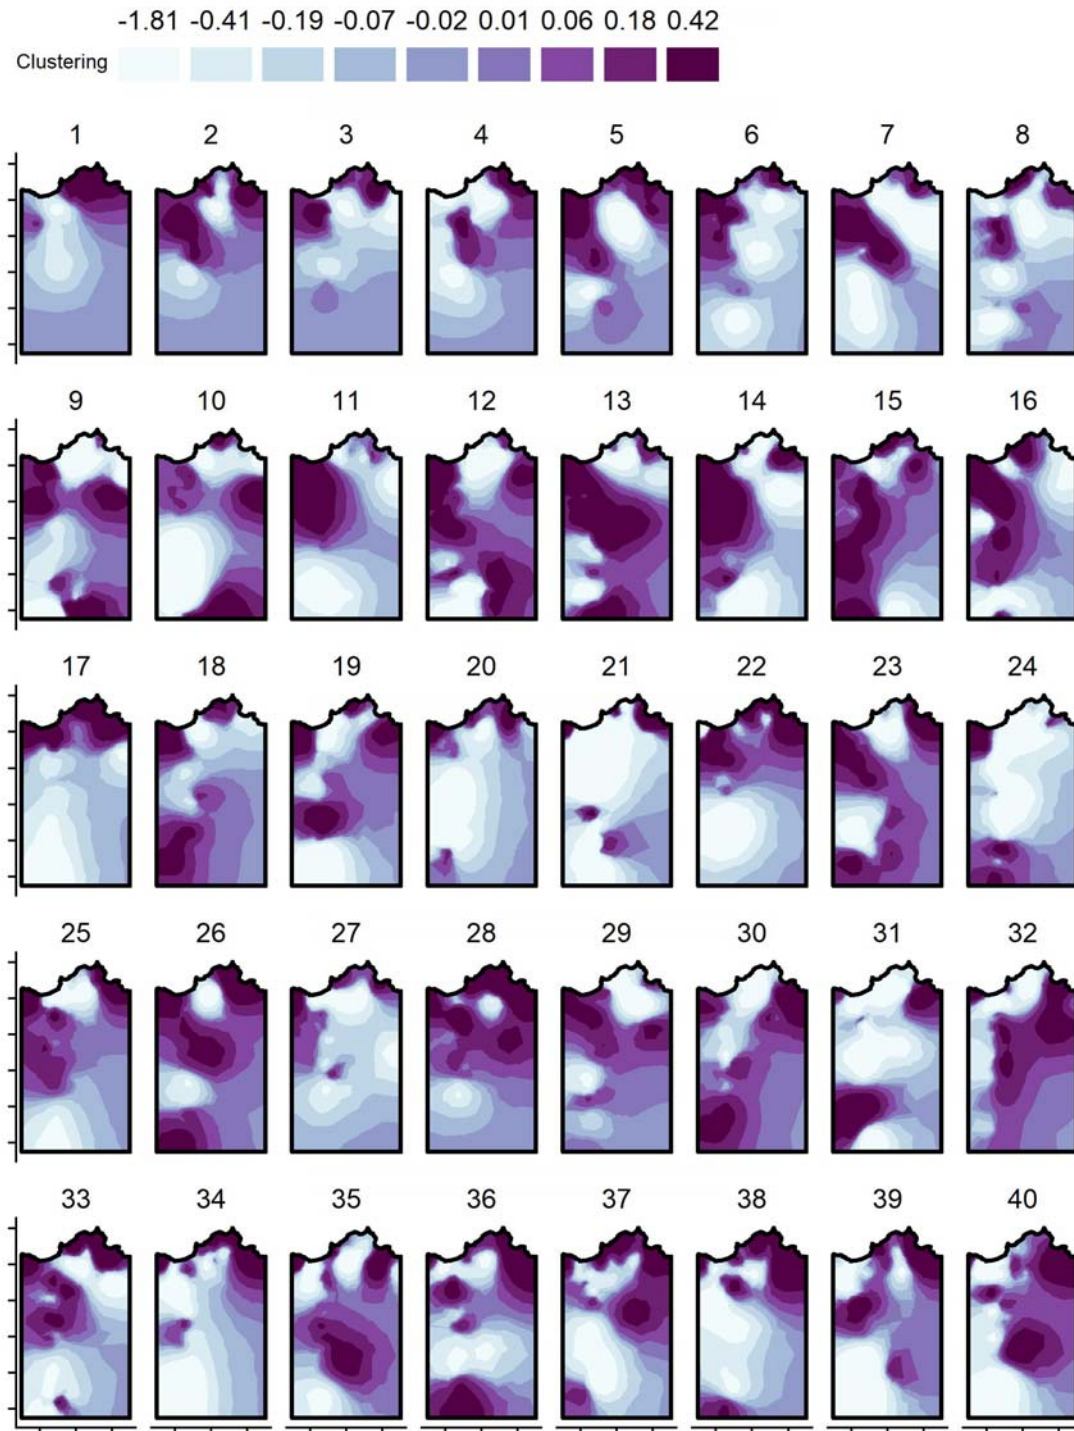

733

734 Supplementary Figure 12: Annual spatial fields for the SPDE random effect for clustering, taken from  
735 the INLA animal models and based on annual centroid point locations. Darker colours correspond to  
736 greater values. Each axis tick corresponds to 1km distance; for the values associated with the Easting  
737 and Northings, see Figure 1 in the main text.

738
